# Supplementary material for: Development of an Untargeted Metabolomics Strategy to Study the Metabolic Rewiring of Dendritic Cells upon Lipopolysaccharide Activation
Source: MDPI journal article supplement (doi:10.3390/metabo13030311), 2023-02-21
Supplement: s1 [file s1]

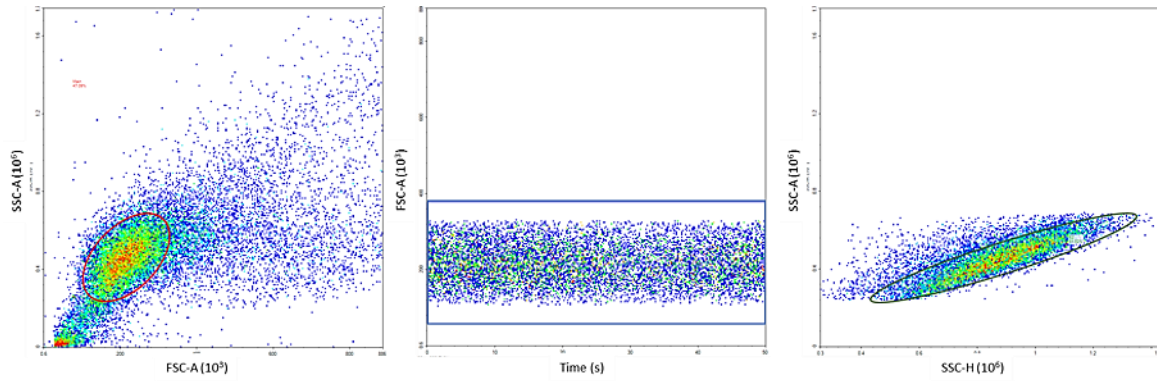

**Figure S1:** Flow cytometry dotplots of the gating strategy applied for DC analysis from CD83 marker example. Total DCs were first gated on a forward scatter (FS)/side scatter (SS) plot (a), and then we verified the quality of the acquisition on Time/FSC-A plot. Furthermore, finally, we gated a single cell on the SSC-H/SSC-A plot to eliminate doublets and other aggregated particles.

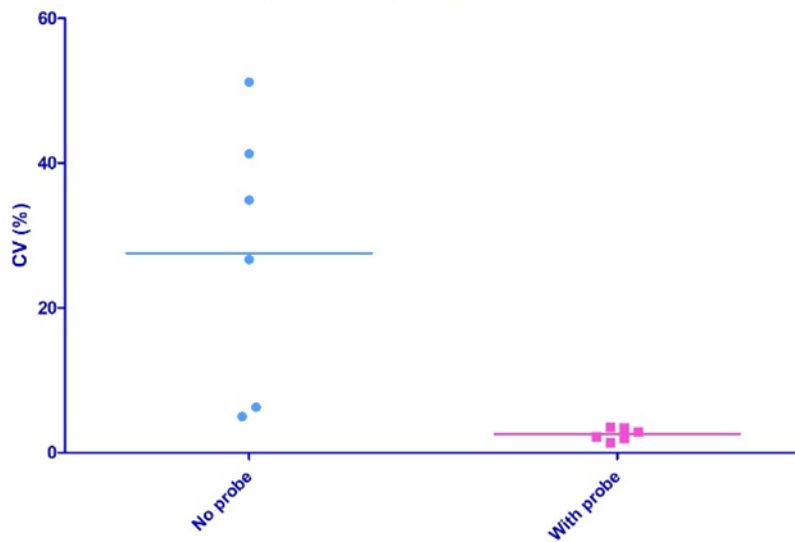

**Figure S2:** Usefulness of using an ultrasonication step (with a sonication probe) to facilitate cell resuspension. Efficiency and robustness of the approach was evaluated by BCA protein quantification. Each point corresponds to the CV of two technical replicates.

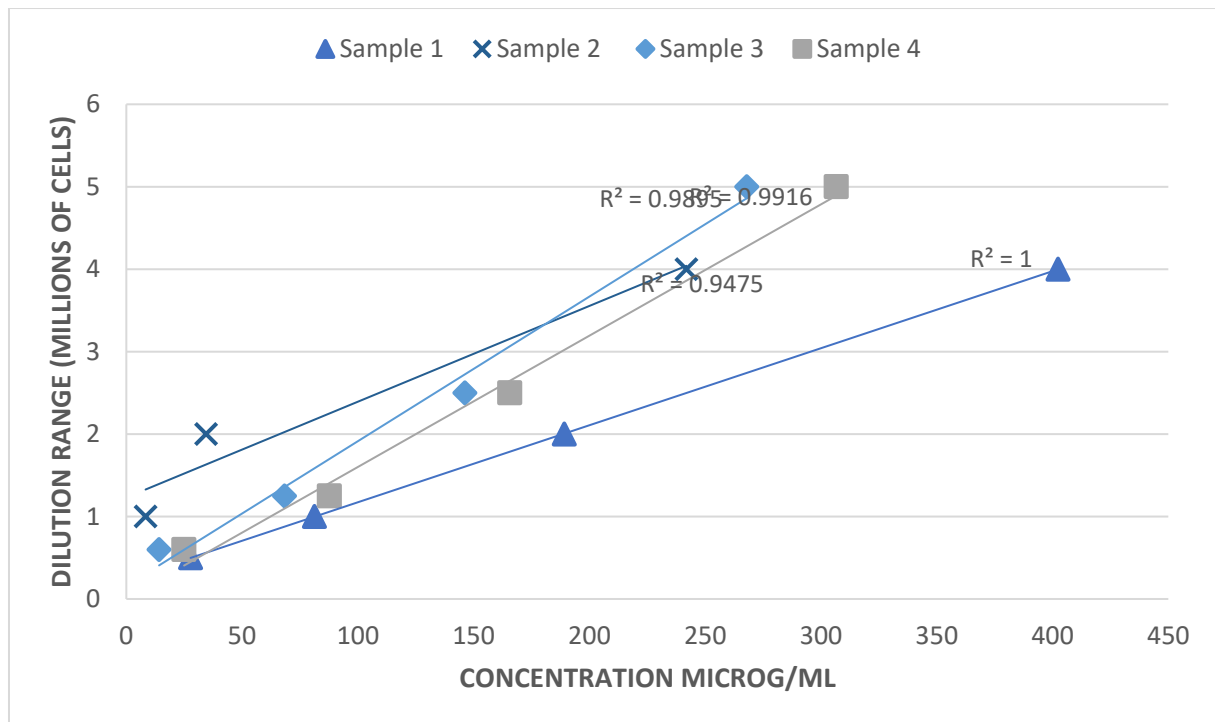

**Figure S3:** Correlation between number of cells precipitated and BCA protein quantification read out. Each data point is the average of 4 technical replicates, 8 different cell numbers were used. (5 Million Cells, 4 M, 2.5 M, 2 M, 1.5 M, 1 M, 0.6 M and 0.5 M after cell counting).

(A)

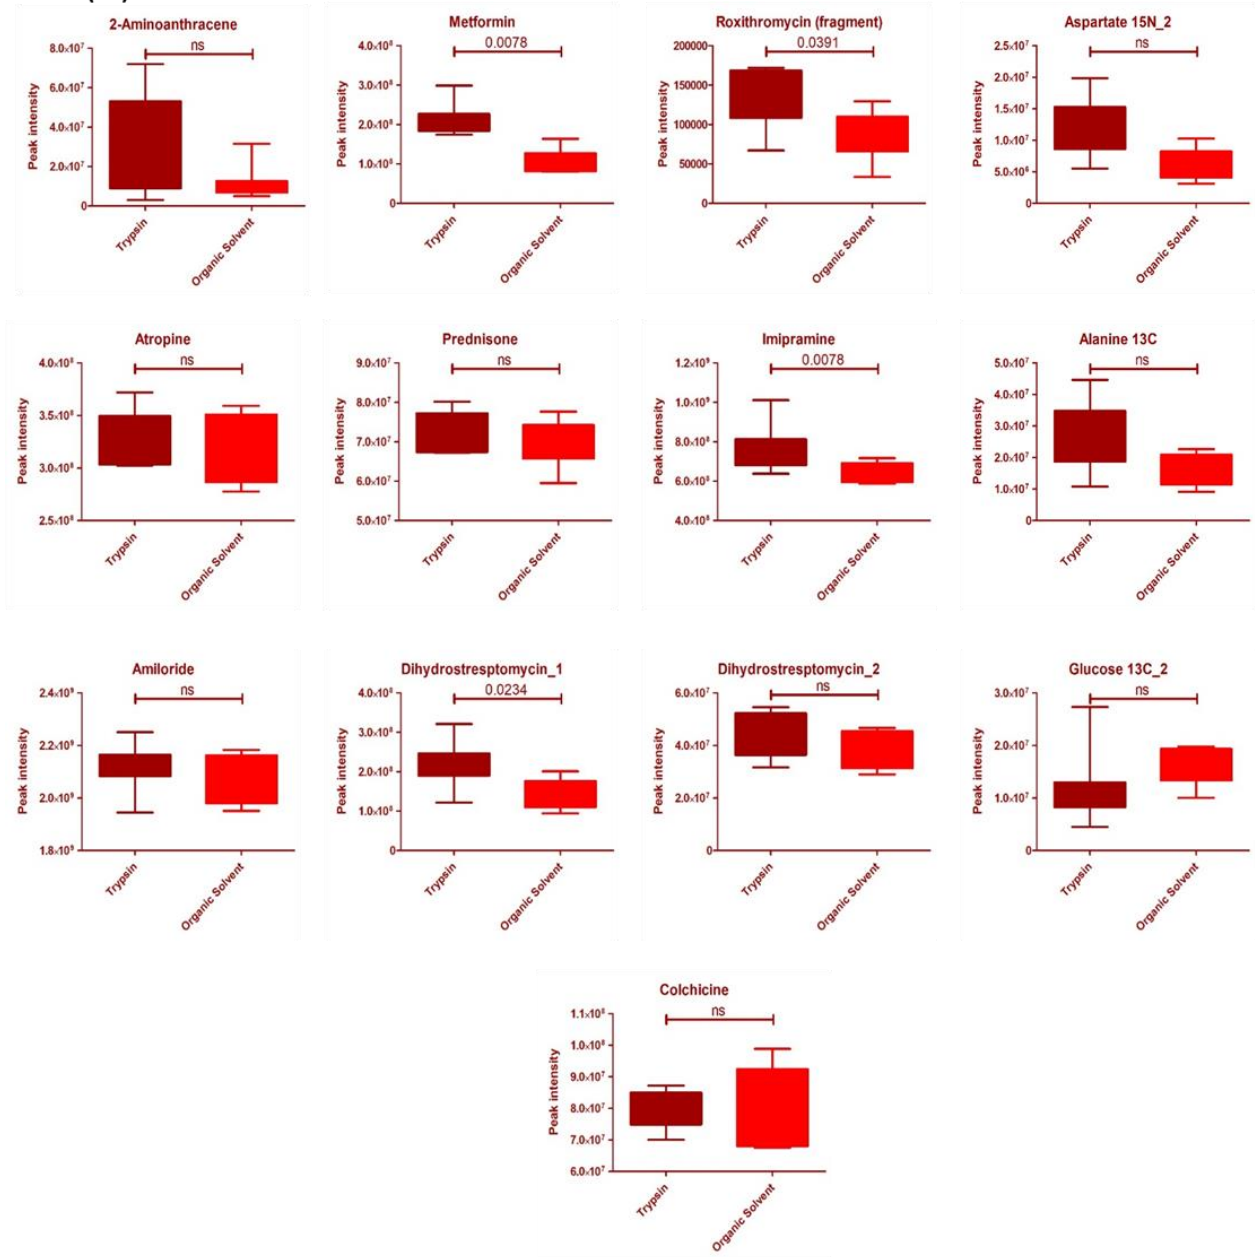

(B)

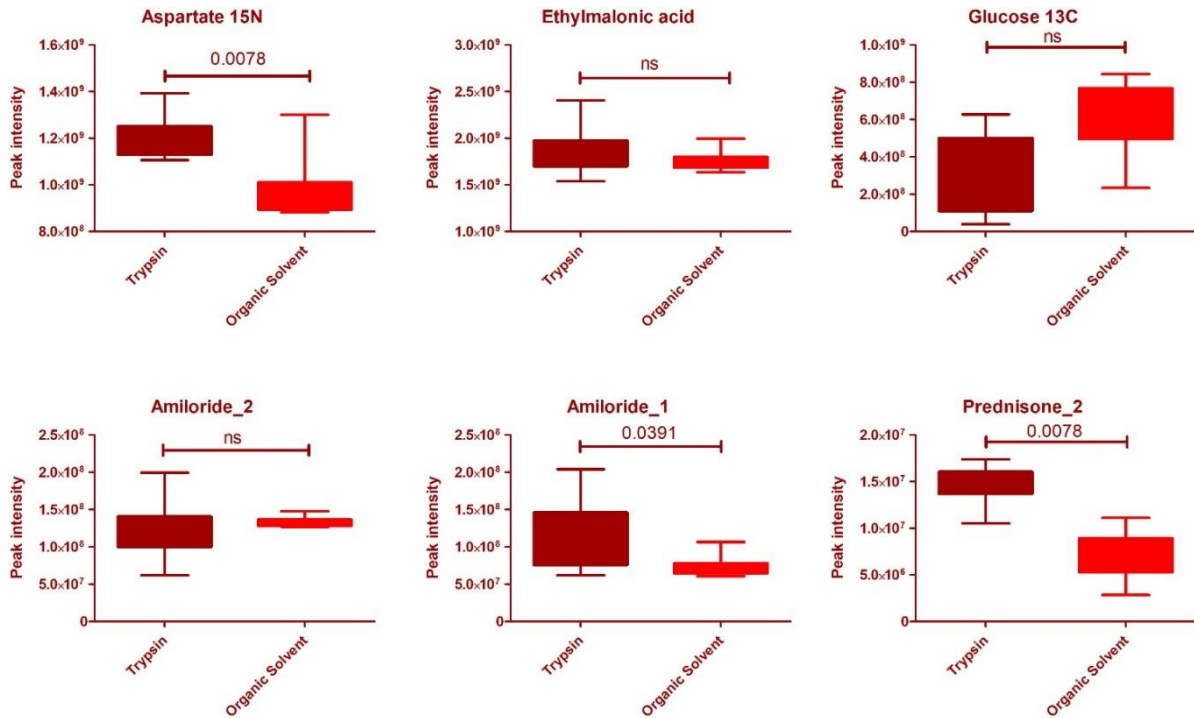

**Figure S4:** Impact of the two sample preparation protocols on the concentrations of external standards during the LC-HRMS analysis in C18(+) (A) and HILIC(-) (B) conditions: (i) use of trypsin to collect the cells followed by a methanolic extraction (trypsin) or (ii) use of the quenching method and simultaneous extraction of the intracellular metabolites by cold methanol (organic solvent).

|   | R2X(cum) | R2Y(cum) | Q2(cum) | RMSEE | pre | ort | pR2Y | pQ2  |
|---|----------|----------|---------|-------|-----|-----|------|------|
| 1 | 0.467    | 0.649    | 0.23    | 0.32  | 2   | 0   | 0.42 | 0.11 |

Inactivated DCs (T0) Inactivated DCs after 24h of culture (Ctrl)

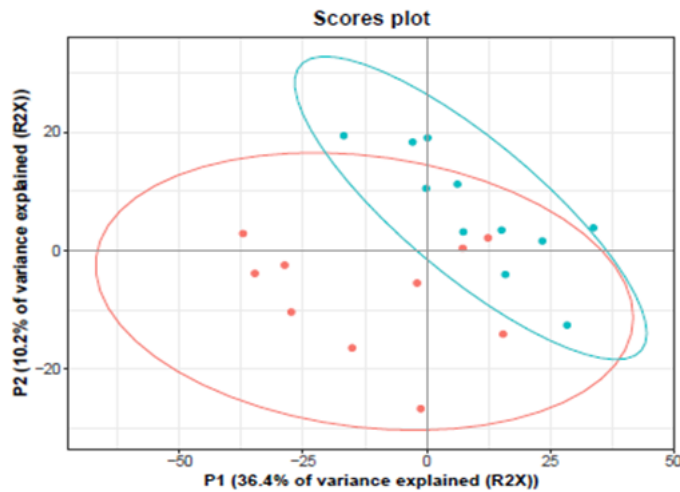

**Figure S5:** Multivariate supervised statistical analysis was performed on samples from DCs directly after differentiation under GM-CSF and IL-4 during 5 days (T0, blue) and after differentiation +24h of

cell culture in more (Ctrl, red). PLS-DA score plot ( $R^2 = 0.649$  and  $Q^2 = 0.23$ ); Data from C18 (+) analyses, 10log transformed.

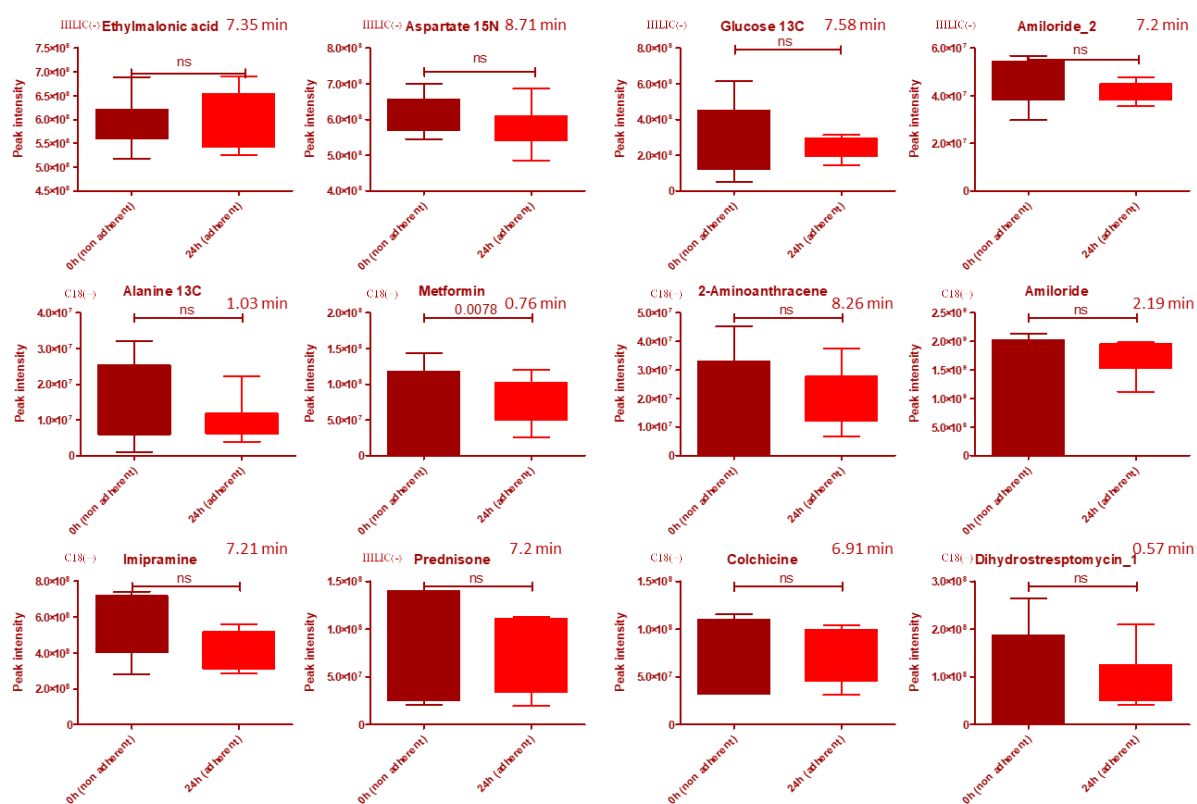

**Figure S6:** Impact of the cellular state [adherent (0 h), non-adherent (24 h)] on concentrations of external standards during the analysis of the samples analyzed under HILIC (-) and C18 (+) conditions.

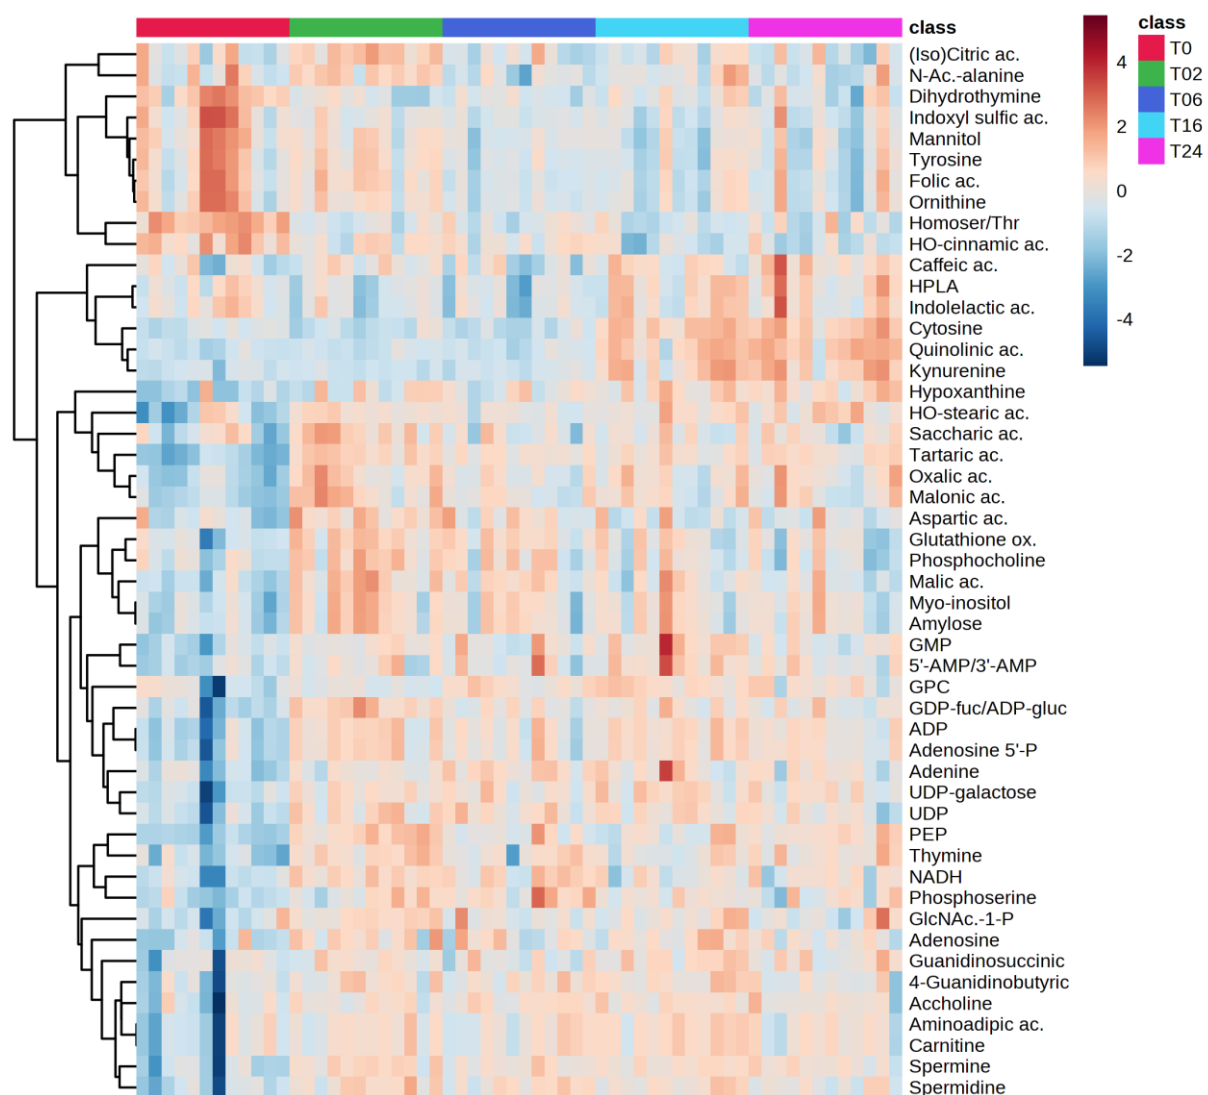

**Figure S7:** Heatmap obtained from unsupervised analysis of the 12 cell samples collected during a 24h kinetics. Presentation of the 62 most significant metabolites from the t-test/ANOVA analysis (Distance measure: Pearson, Clustering method: Mean). Three large clusters can be distinguished, which correspond to (i) decreased metabolite concentrations within the first two hours, (ii) increased metabolite concentrations after the first 6 hours, and at last increased metabolite concentrations after 2 hours.
