# Supplementary material for: Development of an Untargeted Metabolomics Strategy to Study the Metabolic Rewiring of Dendritic Cells upon Lipopolysaccharide Activation
Source: Metabolites. 2023 Feb 21;13(3):311. doi: 10.3390/metabo13030311 (PMC10058937; doi:10.3390/metabo13030311)
Supplement: Supplementary file 1 [file metabolites-13-00311-s001.zip › Supplementary Files Tables_Michieletto.xlsx]

## Sheet: Table S1
Table S1. List of metabolites annotated in dendritic cell samples
Lab_ID	Metabolite	Detected ion	m/z	RT (min)	Chemical Class from KEGG	Metabolite identification criteria	HMDB_id		Metabolite identification criteria
M88T436_1	Alanine	[M-H]-	88.0404	7.26183	Amino Acids, Peptides, and Analogues	a,b,c,e	HMDB00161		a	Based on accurate mass
M89T253	Lactic acid	[M-H]-	89.0243	4.212	Organic Acids and Derivatives	a,b,d	HMDB01311		b	Based on ZIC-pHILIC column retention time similarity with a standard
M97T140	Cyclohexanone	[M-H]-	97.0658	2.33117	Carbohydrates and Carbohydrate Conjugates	a,b,d	HMDB03315		c	Based on C18 column retention time similarity with a standard
M102T503	Aminoisobutyric acid	[M-H]-	102.056	8.38333	Amino Acids, Peptides, and Analogues	a,b,d	HMDB00112		d	Based on MS² spectrum (ESI neg) similarity with a standard
M104T460	Serine	[M-H]-	104.035	7.67333	Amino Acids, Peptides, and Analogues	a,b,d	HMDB00187		e	Based on MS² spectrum (ESI pos) similarity with a standard
M105T370	Glyceric acid	[M-H]-	105.019	6.159	Organic Acids and Derivatives	a,b,d	HMDB00139		f	Based on MS² spectrum similarity with MONA based by MSDIAL
M107T101	Benzyl alcohol	[M-H]-	107.05	1.6845	Amino Acids, Peptides, and Analogues	a,b,d	HMDB03119		g	Based on MS² spectrum similarity with Alexis based (Internal based) by MSDIAL
M183T59_2	Dulcitol/Mannitol	[M+H]+	183.085	0.987833	Lipids/Lipids	a,b,c,d	HMDB00107/HMDB00765
M325T49	UMP	[M+H]+	325.043	0.813333	NA	a,b,c,d	HMDB00288
M150T343	Guanine	[M-H]-	150.042	5.70967	Benzenoids	a,b,c,d,e	HMDB00132
M282T374	Guanosine	[M-H]-	282.084	6.22633	Amino Acids, Peptides, and Analogues	a,b,c,d,e	HMDB00133
M135T274_2	Hypoxanthine	[M-H]-	135.031	4.56767	Amino Acids, Peptides, and Analogues	a,b,c,d,e	HMDB00157
M114T377	Proline	[M-H]-	114.056	6.28233	Amino Acids, Peptides, and Analogues	a,b,c,d,e	HMDB00162
M118T424	Threonine/Homoserine	[M-H]-	118.051	7.073	Amino Acids, Peptides, and Analogues	a,b,c,d,e	HMDB00167/HMDB00719/HMDB04041
M130T228_1	Isoleucine/Leucine	[M-H]-	130.087	3.799	Amino Acids, Peptides, and Analogues	a,b,c,d,e	HMDB00172/HMDB03640
M243T250	Uridine	[M-H]-	243.062	4.17417	Aromatic Homomonocyclic Compounds	a,b,c,d,e	HMDB00296
M152T108	3-Aminosalicylic acid	[M-H]-	152.035	1.801	Aromatic Homomonocyclic Compounds	a,b,c,d,e	HMDB01972
M137T158	2-Aminopyridine-3-carboxylic acid	[M-H]-	137.036	2.64017	#N/A	a,b,c,d,e	NA
M140T526_1	Phosphorylethanolamine	[M-H]-	140.012	8.76783	Organophosphorus Compounds	a,b,c,e	HMDB00224
M111T250	Uracil	[M-H]-	111.02	4.16883	Aromatic Heteromonocyclic Compounds	a,b,c,e	HMDB00300
M187T157	Glycyl-leucine	[M-H]-	187.109	2.6185	Amino Acids, Peptides, and Analogues	a,b,c,e	HMDB00759
M228T464	Ergothioneine	[M-H]-	228.081	7.7345	Carbohydrates and Carbohydrate Conjugates	a,b,c,e	HMDB03045
M182T502	Phosphocholine	[M-H]-	182.059	8.36983	Lipids	a,b,c,e	NA
M182T106	4-Pyridoxic acid	[M-H]-	182.046	1.76067	Aromatic Heteromonocyclic Compounds	a,b,d	HMDB00017
M134T206	Adenine	[M-H]-	134.047	3.426	Amino Acids, Peptides, and Analogues	a,b,d	HMDB00034
M346T505	5'-AMP/3'-AMP	[M-H]-	346.056	8.41433	Nucleosides, Nucleotides, and Analogues	a,b,d	HMDB00045
M289T542	Argininosuccinic acid	[M-H]-	289.115	9.026	Organophosphorus Compounds	a,b,d	HMDB00052
M130T457_2	Creatine	[M-H]-	130.062	7.61717	Lipids	a,b,d	HMDB00064
M191T584_3	Citric acid/Isocitric acid	[M-H]-	191.02	9.73617	Organic Acids and Derivatives	a,b,d	HMDB00094/HMDB00193
M440T567	Folic acid	[M-H]-	440.132	9.457	Aromatic Heteropolycyclic Compounds	a,b,d	HMDB00121
M179T454_2	Glucose/Galactose/Allose/Sorbose/Mannose/Fructose	[M-H]-	179.056	7.56817	Carbohydrates and Carbohydrate Conjugates	a,b,d	HMDB00122/HMDB00143/HMDB01151/HMDB01266/HMDB00169/HMDB00660
M171T503	Glycerol 3-phosphate	[M-H]-	171.006	8.37567	Carbohydrates and Carbohydrate Conjugates	a,b,d	HMDB00126
M116T490	Guanidineacetic acid	[M-H]-	116.047	8.16317	Amino Acids, Peptides, and Analogues	a,b,d	HMDB00128
M146T503_3	Glutamic acid	[M-H]-	146.046	8.38533	Amino Acids, Peptides, and Analogues	a,b,d	HMDB00148
M180T343_2	Tyrosine	[M-H]-	180.067	5.71233	Amino Acids, Peptides, and Analogues	a,b,d	HMDB00158
M164T184_1	Phenylalanine	[M-H]-	164.072	3.075	Aliphatic Acyclic Compounds	a,b,d	HMDB00159
M131T452	Asparagine/Gly-Gly/3-Ureidopropionic acid	[M-H]-	131.046	7.52617	Amino Acids, Peptides, and Analogues	a,b,d	HMDB00168/HMDB11733/HMDB00026
M347T546	Inosine 5'-monophosphate	[M-H]-	347.04	9.1045	Aromatic Heteropolycyclic Compounds	a,b,d	HMDB00175
M154T436	Histidine	[M-H]-	154.062	7.271	Lipids	a,b,d	HMDB00177
M145T563_1	Lysine	[M-H]-	145.098	9.38317	Lipids	a,b,d	HMDB00182
M132T504_3	Aspartic acid	[M-H]-	132.03	8.395	Amino Acids, Peptides, and Analogues	a,b,d	HMDB00191
M267T322	Inosine	[M-H]-	267.073	5.3645	Nucleosides, Nucleotides, and Analogues	a,b,d	HMDB00195
M117T507_2	Succinic acid	[M-H]-	117.019	8.45083	Organic Acids and DerivativeS	a,b,d	HMDB00254
M163T104	Phenylpyruvic acid	[M-H]-	163.04	1.73983	Aromatic Homomonocyclic Compounds	a,b,d	HMDB00205
M145T514	α-Ketoglutaric acid	[M-H]-	145.014	8.56333	Organophosphorus Compounds	a,b,d	HMDB00208
M218T211	Pantothenic acid	[M-H]-	218.103	3.51617	Organic Acids and Derivatives	a,b,d	HMDB00210
M179T547_3	Myo-inositol	[M-H]-	179.056	9.1245	Aliphatic Homomonocyclic Compounds	a,b,d	HMDB00211
M131T541	Ornithine	[M-H]-	131.083	9.01517	Amino Acids, Peptides, and Analogues	a,b,d	HMDB00214
M308T454	N-Acetylneuraminic acid	[M-H]-	308.099	7.56333	NA	a,b,d	HMDB00230
M166T504_2	Quinolinic acid	[M-H]-	166.014	8.40767	Lipids	a,b,d	HMDB00232
M341T483	Sucrose/Trehalose/Melibiose	[M-H]-	341.109	8.05417	Carbohydrates and Carbohydrate Conjugates	a,b,d	HMDB00258/HMDB00975/HMDB00048
M125T110	Thymine	[M-H]-	125.036	1.82883	Lipids	a,b,d	HMDB00262
M128T291_2	Pyroglutamic acid	[M-H]-	128.035	4.85583	Aliphatic Heteromonocyclic Compounds	a,b,d	HMDB00267/HMDB00805
M184T503	Phosphoserine	[M-H]-	184.002	8.38217	Amino Acids, Peptides, and Analogues	a,b,d	HMDB00272
M275T527	Saccharopine	[M-H]-	275.125	8.7915	Organic Acids and Derivatives	a,b,d	HMDB00279
M323T530	UMP	[M-H]-	323.028	8.82867	NA	a,b,d	HMDB00288
M167T416	Uric acid	[M-H]-	167.021	6.931	Amino Acids, Peptides, and Analogues	a,b,d	HMDB00289
M606T536	Uridine 5′-diphospho-N-acetylglucosamine	[M-H]-	606.074	8.92633	Amino Acids, Peptides, and Analogues	a,b,d	HMDB00290
M151T380	Xanthine	[M-H]-	151.026	6.34083	Amino Acids, Peptides, and Analogues	a,b,d	HMDB00292
M403T560	UDP	[M-H]-	402.995	9.33533	NA	a,b,d	HMDB00295
M137T315	4-Imidazoleacrylic acid/5-Aminopyridine-3-carboxylic acid	[M-H]-	137.036	5.2505	Aromatic Heteromonocyclic Compounds	a,b,d	HMDB00301/NA
M565T565	Uridine 5'-diphosphogalactose	[M-H]-	565.048	9.41483	Lipids	a,b,d	HMDB00302
M221T514	Cystathionine	[M-H]-	221.06	8.57383	Aromatic Heteropolycyclic Compounds	a,b,d	HMDB00455
M129T107	3-Methyl-2-oxovaleric acid/4-Methyl-2-oxovaleric acid	[M-H]-	129.056	1.78867	Lipids/Lipids/Organic Acids and Derivatives	a,b,d	HMDB00491/HMDB00695
M173T589_3	Arginine	[M-H]-	173.104	9.81633	Aromatic Heteropolycyclic Compounds	a,b,d	HMDB00517
M116T326	N-Acetylglycine	[M-H]-	116.035	5.4265	Amino Acids, Peptides, and Analogues	a,b,d	HMDB00532
M115T104	Caproic acid	[M-H]-	115.076	1.73083	Lipids	a,b,d	HMDB00535
M112T212	Creatinine	[M-H]-	112.052	3.529	Amino Acids, Peptides, and Analogues	a,b,d	HMDB00562
M195T468	Galactonic acid	[M-H]-	195.051	7.8065	Carbohydrates and Carbohydrate Conjugates	a,b,d	HMDB00565
M151T382	Arabitol/Adonitol	[M-H]-	151.061	6.36517	Carbohydrates and Carbohydrate Conjugates	a,b,d	HMDB00568/HMDB01851
M281T81	Elaidic acid	[M-H]-	281.249	1.34817	Lipids	a,b,d	HMDB00573
M147T506_2	a-Hydroxyglutaric acid	[M-H]-	147.03	8.43933	Organic Acids and Derivatives	a,b,d	HMDB00606
M110T213	Cytosine	[M-H]-	110.036	3.543	Amino Acids, Peptides, and Analogues	a,b,d	HMDB00630
M129T505	Citraconic acid/Itaconic acid/Mesaconic acid	[M-H]-	129.019	8.41917	Organic Acids and Derivatives	a,b,d	HMDB00634/HMDB02092/HMDB00749
M145T450	Glutamine	[M-H]-	145.062	7.50217	Amino Acids, Peptides, and Analogue	a,b,d	HMDB00641
M285T86	Hexadecanedioic acid	[M-H]-	285.207	1.42633	Amino Acids, Peptides, and Analogues	a,b,d	HMDB00672
M212T158	Indoxyl sulfate	[M-H]-	212.002	2.64017	Aromatic Heteropolycyclic Compounds	a,b,d	HMDB00682
M207T206	Kynurenine	[M-H]-	207.078	3.4375	Lipids	a,b,d	HMDB00684
M148T245	Methionine	[M-H]-	148.044	4.08983	Amino Acids, Peptides, and Analogues	a,b,d	HMDB00696
M130T493	4-hydroxy-proline/3-Hydroxy-proline	[M-H]-	130.051	8.21067	Amino Acids, Peptides, and Analogues	a,b,d	HMDB00725/NA
M116T143	Indole	[M-H]-	116.051	2.38167	Aromatic Heteropolycyclic Compounds	a,b,d	HMDB00738
M133T530	Malic acid	[M-H]-	133.014	8.84133	Organic Acids and Derivatives	a,b,d	HMDB00744
M129T585	Mesaconic acid/Itaconic acid/Citraconic acid	[M-H]-	129.019	9.75467	Organic Acids and Derivatives/Lipids	a,b,d	HMDB00749/HMDB02092/HMDB00634
M149T245	Xylulose/Ribose	[M-H]-	149.047	4.08833	Carbohydrates and Carbohydrate Conjugate	a,b,d	HMDB00751/HMDB00283
M117T152	3-Hydroxy 3-methylbutyric acid /2-Hydroxy 3-methylbutyric acid /3-Hydroxypentanoic acid	[M-H]-	117.056	2.53317	Organic Acids and Derivatives/Lipids/Lipids/Organic Acids and Derivatives/Organic Acids and Derivatives/Organic Acids and Derivatives	a,b,d	HMDB00754/HMDB01987/HMDB00407/HMDB01863/HMDB00531/HMDB00410
M181T213	Hydroxyphenyllactic acid	[M-H]-	181.051	3.55333	Aromatic Homomonocyclic Compounds	a,b,d	HMDB00755
M243T363	beta-Pseudouridine	[M-H]-	243.062	6.05583	Carbohydrates and Carbohydrate Conjugates	a,b,d	HMDB00767
M174T493_3	N-Acetyl-aspartic acid	[M-H]-	174.041	8.21533	Amino Acids, Peptides, and Analogues	a,b,d	HMDB00812
M172T138	Quinaldic acid	[M-H]-	172.041	2.30367	Lipids	a,b,d	HMDB00842
M145T174	Monomethyl glutaric acid	[M-H]-	145.051	2.90467	NA	a,b,d	HMDB00858
M116T319_1	Valine	[M-H]-	116.072	5.31517	Amino Acids, Peptides, and Analogues	a,b,d	HMDB00883
M662T479	ß-Nicotinamide adenine dinucleotide	[M-H]-	662.102	7.9855	Aromatic Heteropolycyclic Compounds	a,b,d	HMDB00902
M203T251	Tryptophan	[M-H]-	203.083	4.17617	Amino Acids, Peptides, and Analogues	a,b,d	HMDB00929
M579T639	Uridine 5'-diphosphoglucuronic acid	[M-H]-	579.027	10.642	Aliphatic Acyclic Compounds	a,b,d	HMDB00935
M149T555	Tartaric acid	[M-H]-	149.009	9.247	Organophosphorus Compounds	a,b,d	HMDB00956
M173T585	Aconitic acid	[M-H]-	173.009	9.754	Organic Acids and Derivatives	a,b,d	HMDB00958/HMDB00072
M289T539	Sedoheptulose 7-phosphate	[M-H]-	289.033	8.97967	Amino Acids, Peptides, and Analogues	a,b,d	HMDB01068
M588T591	Guanosine 5'-diphospho-ß-fucose/Adenosine-5'-diphosphoglucose	[M-H]-	588.075	9.84983	Nucleosides, Nucleotides, and Analogues	a,b,d	HMDB01095/HMDB06557
M296T129	5'-Deoxy-5'-(methylthio)adenosine	[M-H]-	296.082	2.15767	Nucleosides, Nucleotides, and Analogues	a,b,d	HMDB01173
M558T498	Adenosine diphosphate ribose	[M-H]-	558.064	8.302	NA	a,b,d	HMDB01178
M442T591	GDP	[M-H]-	442.017	9.84883	Amino Acids, Peptides, and Analogues	a,b,d	HMDB01201
M258T517	Glucosamine 6-phosphate	[M-H]-	258.038	8.61383	Amino Acids, Peptides, and Analogues	a,b,d	HMDB01254
M426T531	ADP	[M-H]-	426.022	8.846	Organic Acids and Derivatives	a,b,d	HMDB01341
M300T505	N-Acetyl-a-glucosamine 1-phosphate	[M-H]-	300.049	8.4175	NA	a,b,d	HMDB01367
M362T562	GMP	[M-H]-	362.051	9.35933	Aromatic Heteromonocyclic Compounds	a,b,d	HMDB01397
M121T140_2	Nicotinamide	[M-H]-	121.041	2.338	Aromatic Heteromonocyclic Compounds	a,b,d	HMDB01406
M169T513	Dihydroxyacetone phosphate	[M-H]-	168.991	8.5515	#N/A	a,b,d	HMDB01473
M664T456	NADH	[M-H]-	664.117	7.598	Nucleosides, Nucleotides, and Analogues	a,b,d	HMDB01487
M455T493	Riboflavin 5'-monophosphate	[M-H]-	455.095	8.21183	Organic Acids and Derivatives	a,b,d	HMDB01520
M131T122	2-hydroxycaproic acid	[M-H]-	131.071	2.03833	Organic Acids and Derivatives	a,b,d	HMDB01624
M163T343	trans-3-Hydroxycinnamic acid	[M-H]-	163.04	5.72083	Aromatic Homomonocyclic Compounds	a,b,d	HMDB01713
M193T82_2	Caffeine	[M-H]-	193.074	1.372	Aromatic Homomonocyclic Compounds	a,b,d	HMDB01847
M150T134	Acetaminophen	[M-H]-	150.056	2.2375	Aromatic Homomonocyclic Compounds	a,b,d	HMDB01859
M115T126	2-Oxovaleric acid	[M-H]-	115.04	2.09967	Organic Acids and Derivatives	a,b,d	HMDB01865
M179T170	Caffeic acid	[M-H]-	179.035	2.831	Aromatic Homomonocyclic Compounds	a,b,d	HMDB01964
M146T326	Acetyl-serine	[M-H]-	146.046	5.43067	Amino Acids, Peptides, and Analogues/Amino Acids, Peptides, and Analogues	a,b,d	HMDB03011
M611T575	Glutathione oxidized	[M-H]-	611.144	9.58	Amino Acids, Peptides, and Analogues	a,b,d	HMDB03337
M161T475	Amylose	[M-H]-	161.046	7.92267	Carbohydrates and Carbohydrate Conjugates/Organic Acids and Derivatives	a,b,d	HMDB03403
M163T94	Eugenol /Isoeugenol	[M-H]-	163.077	1.5665	Aromatic Homomonocyclic Compounds	a,b,d	HMDB05809/HMDB05802
M296T215	2'-O-Methylguanosine/2-Methylguanosine	[M-H]-	296.1	3.579	Nucleosides, Nucleotides, and Analogues	a,b,d	HMDB05862/HMDB05862
M259T551_3	Glucose 1-phosphate/Fructose 1-phosphate/Galactose 1-phosphate/Fructose 6-phosphate/Mannose 6-phosphate/α-Mannose 1-phosphate/Glucose-6-PO4	[M-H]-	259.022	9.17933	Carbohydrates and Carbohydrate Conjugates	a,b,d	HMDB06330/HMDB01078/HMDB00124/HMDB00645/HMDB01076/HMDB01586/HMDB01401
M190T142	N-Acetyl-methionine	[M-H]-	190.054	2.36733	Amino Acids, Peptides, and Analogues	a,b,d	HMDB11745
M158T139	N-acetyl-Valine/N-acetyl-norvaline/N-Isovaleroylglycine	[M-H]-	158.082	2.32083	Amino Acids, Peptides, and Analogues	a,b,d	HMDB11757/NA/HMDB00678
M271T82	2-Hydroxyhexadecanoic acid	[M-H]-	271.228	1.37167	Lipids	a,b,d	HMDB31057
M149T522	2,2'-Thiodiacetic acid	[M-H]-	148.991	8.69883	Lipids	a,b,d	HMDB42032
M159T140	mono-Methyl adipate	[M-H]-	159.066	2.32983	Amino Acids, Peptides, and Analogues	a,b,d	HMDB59722
M194T82_2	N-Acetyl-5-aminosalicylic acid/N-Acetyl-4-aminosalicylic acid	[M-H]-	194.045	1.37433	Benzenoids/NA	a,b,d	HMDB60602/NA
M295T83	13-Hydroxyoctadeca-9Z,11E-dienoic acid	[M-H]-	295.228	1.38233	NA	a,b,d	NA
M299T82	alpha-Hydroxystearic acid	[M-H]-	299.259	1.367	Lipids	a,b,d	NA
M303T551	N-Acetyl-Asp-Glu	[M-H]-	303.083	9.18883	NA	a,b,d	NA
M135T423	Threonic acid	[M-H]-	135.03	7.05383	NA	a,b,d	NA
M339T578	D-Myo-inositol 1,4-bisphosphate	[M-H]-	338.989	9.64033	Carbohydrates and Carbohydrate Conjugates/NA	a,b,d	NA
M604T605	Guanosine 5'-diphosphoglucose/Guanosine 5'-diphospho-mannose	[M-H]-	604.07	10.0832	Nucleosides, Nucleotides, and Analogues	a,b,d	NA/HMDB01163
M187T95	10-hydroxydecanoic acid/3-hydroxydecanoic acid	[M-H]-	187.134	1.58283	Organic Acids and Derivatives	a,b,d	NA/HMDB02203
M165T101	2-Phenoxypropionic acid/3-Phenoxypropionic acid/Methyl 4-hydroxyphenylacetate/4-(Hydroxymethyl)phenylacetic acid	[M-H]-	165.056	1.6845	Aromatic Homomonocyclic Compounds	a,b,d	NA/HMDB02229/NA/NA/HMDB00779/HMDB02199/NA
M121T101	3-Ethylphenol/2-Ethylphenol/4-Ethylphenol	[M-H]-	121.066	1.6855	NA	a,b,d	NA/NA/HMDB29306
M188T479	N acetyl glutamic acid/N-Acetyl-glutamic acid	[M-H]-	188.056	7.98417	Amino Acids, Peptides, and Analogues	a,b,d,f	HMDB01138/HMDB01138
M118T44_3	Betaine	[M+H]+	118.086	0.7345	Amino Acids, Peptides, and Analogues/Amino Acids, Peptides, and Analogues/Amino Acids, Peptides, and Analogues/Aliphatic Acyclic Compounds	a,c,e	HMDB00043
M175T58	Aconitic acid/Dehydroascorbic acid	[M+H]+	175.024	0.962167	Organic Acids and Derivatives/Organic Acids and Derivatives/Carbohydrates and Carbohydrate Conjugates	a,c,e	HMDB00072/HMDB00958/HMDB01264
M284T64	Guanosine	[M+H]+	284.099	1.07017	Amino Acids, Peptides, and Analogues	a,c,e	HMDB00133
M137T54_3	Hypoxanthine	[M+H]+	137.046	0.901833	Amino Acids, Peptides, and Analogues	a,c,e	HMDB00157
M166T102_4	Phenylalanine	[M+H]+	166.087	1.696	Aliphatic Acyclic Compounds	a,c,e	HMDB00159
M132T91	Leucine/Isoleucine	[M+H]+	132.102	1.5235	Amino Acids, Peptides, and Analogues	a,c,e	HMDB00172/HMDB00687
M132T64_2	Isoleucine/Leucine	[M+H]+	132.102	1.0715	Amino Acids, Peptides, and Analogues	a,c,e	HMDB00172/HMDB03640
M147T36	Lysine	[M+H]+	147.113	0.603667	Lipids	a,c,e	HMDB00182
M193T57	Isocitric acid/Citric acid	[M+H]+	193.035	0.954333	Organic Acids and Derivatives	a,c,e	HMDB00193/HMDB00094
M165T59	Phenylpyruvic acid/trans-3-Hydroxycinnamic acid	[M+H]+	165.055	0.988167	Aromatic Homomonocyclic Compounds	a,c,e	HMDB00205/HMDB01713
M222T78	N-Acetylgalactosamine/N-Acetylmannosamine/N-Acetyl-glucosamine	[M+H]+	222.096	1.30267	Carbohydrates and Carbohydrate Conjugates	a,c,e	HMDB00212/HMDB01129/HMDB00215
M358T570	Indomethacin	[M+H]+	358.085	9.5015	Lipids	a,c,e	HMDB00244
M245T57	Uridine	[M+H]+	245.077	0.952167	Nucleosides, Nucleotides, and Analogues	a,c,e	HMDB00296
M113T53	Uracil	[M+H]+	113.035	0.8805	Aromatic Heteromonocyclic Compounds	a,c,e	HMDB00300
M162T48	Alpha-Aminoadipic acid	[M+H]+	162.076	0.799667	Lipids	a,c,e	HMDB00510
M208T399	N-Acetyl-phenylalanine	[M+H]+	208.097	6.64583	Amino Acids, Peptides, and Analogues	a,c,e	HMDB00512
M122T90	Cysteine	[M+H]+	122.027	1.494	Aromatic Heteropolycyclic Compounds	a,c,e	HMDB00574
M150T54	Methionine	[M+H]+	150.059	0.896667	Amino Acids, Peptides, and Analogues	a,c,e	HMDB00696
M131T56_1	Mesaconic acid/Citraconic acid	[M+H]+	131.034	0.930833	Lipids/Organic Acids and Derivatives/Lipids	a,c,e	HMDB00749/HMDB00634
M165T79_2	1,5-Anhydro-sorbitol	[M+H]+	165.076	1.31833	Carbohydrates and Carbohydrate Conjugates	a,c,e	HMDB02712
M166T48	7-methylguanine/1-methyl guanine	[M+H]+	166.073	0.7955	Aromatic Heteropolycyclic Compounds	a,c,e	HMDB00897/HMDB03282
M251T54	γ-Glutamylcysteine	[M+H]+	251.07	0.903833	Amino Acids, Peptides, and Analogues	a,c,e	HMDB01049
M219T291	N-Acetyl-5-hydroxytryptamine	[M+H]+	219.113	4.85483	Aromatic Heteropolycyclic Compounds	a,c,e	HMDB01238
M146T34	Spermidine	[M+H]+	146.165	0.572	Aliphatic Acyclic Compounds	a,c,e	HMDB01257
M154T147	3-Hydroxyanthranilic acid	[M+H]+	154.05	2.448	Amino Acids, Peptides, and Analogues	a,c,e	HMDB01476
M163T74	3-Hydroxy-3-methylglutaric acid	[M+H]+	163.061	1.2405	Amino Acids, Peptides, and Analogues	a,c,e	HMDB01890
M232T234	Butyryl carnitine	[M+H]+	232.155	3.893	Lipids	a,c,e	HMDB02013
M192T233	N-Acetyl-methionine	[M+H]+	192.069	3.88383	Amino Acids, Peptides, and Analogues	a,c,e	HMDB11745
M247T352_3	N-acetyl-tryptophan	[M+H]+	247.108	5.86617	NA	a,c,e	HMDB13713
M297T86	7-Methylguanosine	[M+H]+	297.109	1.43667	NA	a,c,e	NA
M176T315	Indoxyl acetate	[M+H]+	176.071	5.24867	NA	a,c,e	NA
M175T60	N-Acetyl-ornithine	[M+H]+	175.108	0.993	NA	a,c,e	NA
M182T59_4	3-Amino-3-(4-hydroxyphenyl)propanoic/3-Phenylserine	[M+H]+	182.082	0.988167	Amino Acids, Peptides, and Analogues	a,c,e	NA/HMDB02184
M268T56	Adenosine	[M+H]+	268.104	0.932833	Amino Acids, Peptides, and Analogues	a,c,e,f	HMDB00050
M269T66_2	Inosine	[M+H]+	269.088	1.1055	Nucleosides, Nucleotides, and Analogues	a,c,e,f	HMDB00195
M220T132_2	Pantothenic acid	[M+H]+	220.118	2.20117	Organic Acids and Derivatives	a,c,e,f	HMDB00210
M218T67	Propionylcarnitine	[M+H]+	218.139	1.12083	Lipids	a,c,e,f	HMDB01238
M364T50	GMP	[M+H]+	364.065	0.836167	Aromatic Heteromonocyclic Compounds	a,c,e,f	HMDB01397
M164T90	N-Acetyl-Cystein	[M+H]+	164.038	1.495	Amino Acids, Peptides, and Analogues	a,c,e,f	NA
M221T78	5-hydroxy-tryptophan	[M+H]+	221.092	1.30133	NA	a,c,e,g	HMDB0000472
M152T54	Guanine	[M+H]+	152.057	0.892667	Benzenoids	a,c,e,g	HMDB00132
M156T37	Histidine	[M+H]+	156.077	0.6125	Lipids	a,c,e,g	HMDB00177
M380T68	Lactoylglutathione	[M+H]+	380.113	1.13217	Lipids	a,c,e,g	HMDB01066
M613T54	Glutathione oxidized	[M+H]+	613.16	0.906	Amino Acids, Peptides, and Analogues	a,c,e,g	HMDB03337
M168T46	Pyridoxal	[M+H]+	168.066	0.763667	Aromatic Heteromonocyclic Compounds	a,c,e,g	NA/HMDB01545
M442T261	Folic acid	[M+H]+	442.148	4.35767	Aromatic Heteropolycyclic Compounds	a,c,f	HMDB00121
M377T292	Riboflavin	[M+H]+	377.146	4.86633	Lipids	a,c,f	HMDB00244
M130T60_3	Pyroglutamic acid	[M+H]+	130.05	0.995	Aliphatic Heteromonocyclic Compounds	a,c,f	HMDB00267/HMDB00805

## Sheet: Table S2
Table S2. List of annotated metabolites and relative chemical class differing between trypsin/organic solvent method
					Statitstic_wilcoxon_TRYP/OrganicSolvent
Metabolite	Metabolism	Detected ion	m/z	rt (min)	pvalue	pvalue_BH	Ratio Trypsin/OrganicSolvent	HMDB_id	kegg_id
Proline	Amino acid metabolism_Aginine and Proline metabolism	[M-H]-	114.056	6.28233	0.0003108	0.0012	0.271003	HMDB00162	C00148
N-Acetyl-Cystein	Amino acid metabolism_Cysteine and Methionine	[M-H]-	164.038	1.495	0.0001554	0.0005	0.0979432	NA	NA
Methionine	Amino acid metabolism_Cysteine and Methionine	[M-H]-	148.044	4.08983	0.0001554	0.0007	0.173913	HMDB00696	C00073
N-Acetyl-methionine	Amino acid metabolism_Cysteine and Methionine	[M-H]-	190.054	2.36733	0.0001554	0.0007	0.22779	HMDB11745	C02712
5'-Deoxy-5'-(methylthio)adenosine	Amino acid metabolism_Cysteine and Methionine	[M-H]-	296.082	2.15767	0.0003108	0.0012	0.240385	HMDB01173	C00170
Valine	Amino acid metabolism_Glycine, Serine and Threonine	[M-H]-	116.072	5.31517	0.0001554	0.0007	0.157978	HMDB00883	C00719
N-Acetylglycine	Amino acid metabolism_Glycine, Serine and Threonine		116.035	5.4265	0.0003108	0.0012	0.490196	HMDB00532	NA
N-Acetyl-phenylalanine	Amino acid metabolism_Phenylalanine metabolism	[M+H]+	208.097	6.64583	0.0001554	0.0005	0.035727	HMDB00512	NA
Phenylalanine	Amino acid metabolism_Phenylalanine metabolism	[M+H]+	166.087	1.696	0.0001554	0.0005	0.131752	HMDB00159	C00079
Phenylalanine	Amino acid metabolism_Phenylalanine metabolism	[M-H]-	164.072	3.075	0.0001554	0.0007	0.13624	HMDB00159	C00079
N-Acetyl-phenylalanine	Amino acid metabolism_Phenylalanine metabolism	[M-H]-	206.082	1.80883	0.0001554	0.0007	0.16129	HMDB00512	C03519
Tyrosine	Amino acid metabolism_Phenylalanine metabolism	[M-H]-	180.067	5.71233	0.0001554	0.0007	0.166667	HMDB00158	C00082
Phenylpyruvic acid	Amino acid metabolism_Phenylalanine metabolism	[M-H]-	163.04	1.73983	0.0001554	0.0007	0.172414	HMDB00205	C00166
3-Hydroxyanthranilic acid	Amino acid metabolism_Tryptophan metabolism	[M+H]+	154.05	2.448	0.0001554	0.0005	0.0279252	HMDB01476	C00632
N-acetyl-tryptophan	Amino acid metabolism_Tryptophan metabolism	[M+H]+	247.108	5.86617	0.0001554	0.0005	0.0453926	HMDB13713	NA
Indoxyl acetate	Amino acid metabolism_Tryptophan metabolism	[M+H]+	176.069	5.8635	0.0001554	0.0005	0.0492854	NA	NA
Indole	Amino acid metabolism_Tryptophan metabolism	[M-H]-	116.051	2.38167	0.0001554	0.0007	0.0515464	HMDB00738	C00463
Quinaldic acid	Amino acid metabolism_Tryptophan metabolism	[M-H]-	172.041	2.30367	0.0001554	0.0007	0.0653595	HMDB00842	C06325
Kynurenine	Amino acid metabolism_Tryptophan metabolism	[M-H]-	207.078	3.4375	0.0001554	0.0007	0.187266	HMDB00684	C00328
N-Acetyl-5-hydroxytryptamine	Amino acid metabolism_Tryptophan metabolism	[M+H]+	219.113	4.85483	0.0029526	0.0062	0.19802	HMDB00210	C00864
5-hydroxy-tryptophan	Amino acid metabolism_Tryptophan metabolism	[M+H]+	221.092	1.30133	0.014763	0.0226	0.261097	HMDB0000472	C00643
Hydroxyphenyllactic acid	Amino acid metabolism_Tyrosine metabolism	[M-H]-	181.051	3.55333	0.0001554	0.0007	0.176991	HMDB00755	C03672
3-Methyl-2-oxovaleric acid/4-Methyl-2-oxovaleric acid	Amino acid metabolism_Valine, Leucine and Isoleucine biosynthesis	[M-H]-	129.056	1.78867	0.0001554	0.0007	0.063012	HMDB00491/HMDB00695	C03465/C00233
Isoleucine/Leucine	Amino acid metabolism_Valine, Leucine and Isoleucine biosynthesis	[M-H]-	130.087	3.799	0.0001554	0.0007	0.128205	HMDB00172/HMDB03640	C00123
Leucine/Isoleucine	Amino acid metabolism_Valine, Leucine and Isoleucine biosynthesis	[M+H]+	132.102	1.0715	0.0001554	0.0005	0.155763	HMDB00172/HMDB00687	C00407/C00123
3-Hydroxy 3-methylbutyric acid /2-Hydroxy 3-methylbutyric acid /3-Hydroxypentanoic acid	Amino acid metabolism_Valine, Leucine and Isoleucine degradation	[M-H]-	117.056	2.53317	0.0001554	0.0007	0.170648	HMDB00754/HMDB01987/HMDB00407/HMDB01863/HMDB00531/HMDB00410	NA/NA/NA/NA/NA/NA
N-acetyl-Valine/N-acetyl-norvaline/N-Isovaleroylglycine	Amino acid metabolism_Valine, Leucine and Isoleucine degradation	[M-H]-	158.082	2.32083	0.000621601	0.0021	0.318471	HMDB11757/NA/HMDB00678	NA/NA/NA
Caffeine	Biosynthesis of other secondary metabolites_Caffeine metabolism	[M-H]-	193.074	1.372	0.0498834	0.0783	0.735294	HMDB01847	C07481
Xanthine	Biosynthesis of other secondary metabolites_Caffeine metabolism	[M-H]-	151.026	6.34083	0.0001554	0.0007	3.33333	HMDB00292	C00385
1,5-Anhydro-sorbitol	Carbohydrate metabolism_Amino sugar and nucleotide sugar matabolism	[M+H]+	165.076	1.31833	0.0018648	0.0042	0.191205	HMDB00897/HMDB03282	C02242/C04152
N-Acetylgalactosamine/N-Acetylmannosamine/N-Acetylglucosamine	Carbohydrate metabolism_Amino sugar and nucleotide sugar matabolism	[M+H]+	222.096	1.30267	0.0206682	0.0298	0.277008	HMDB00245	C00931
Arabitol/Adonitol	Carbohydrate metabolism_Pentose and Glucuronate interconversions	[M-H]-	151.061	6.36517	0.0001554	0.0007	0.136986	HMDB00568/HMDB01851	C00474
Xylulose/Ribose	Carbohydrate metabolism_Pentose and Glucuronate interconversions	[M-H]-	149.047	4.08833	0.014763	0.0281	0.236967	HMDB00751/HMDB00283	C00312/C00121
Lactic acid	Carbohydrate metabolism_Pyruvate metabolism	[M-H]-	89.0243	4.212	0.0001554	0.0007	0.145773	HMDB01311	C00256
Lactoylglutathione	Carbohydrate metabolism_Pyruvate metabolism	[M+H]+	380.113	1.13217	0.0018648	0.0042	5.88235	HMDB01066	C03451
Hexadecanedioic acid	Lipid metabolism_Fatty acids	[M-H]-	285.207	1.42633	0.000621601	0.0021	0.170068	HMDB00672	C19615
2-hydroxycaproic acid	Lipid metabolism_Fatty acids	[M-H]-	131.071	2.03833	0.0001554	0.0007	0.201207	HMDB01624	NA
10-hydroxydecanoic acid/3-hydroxydecanoic acid	Lipid metabolism_Fatty acids	[M-H]-	187.134	1.58283	0.000621601	0.0021	0.210084	NA/HMDB02203	NA/NA
Propionylcarnitine	Lipid metabolism_Fatty acids	[M+H]+	218.139	1.12083	0.014763	0.0226	0.4329	HMDB01238	C00978
alpha-Hydroxystearic acid	Lipid metabolism_Fatty acids	[M-H]-	299.259	1.367	0.0379176	0.062	0.549451	NA	NA
2-Hydroxyhexadecanoic acid	Lipid metabolism_Fatty acids	[M-H]-	271.228	1.37167	0.000621601	0.0021	3.0303	HMDB31057	NA
Elaidic acid	Lipid metabolism_Fatty acids	[M-H]-	281.249	1.34817	0.0001554	0.0007	5	HMDB00573	C00712
13-Hydroxyoctadeca-9Z,11E-dienoic acid	Lipid metabolism_Linoleic acid metabolism	[M-H]-	295.228	1.38233	0.000621601	0.0021	7.69231	NA	NA
Folic acid	Metabolism of cofactors and vitamins_Folate biosynthesis	[M-H]-	442.148	4.35767	0.0001554	0.0005	0.0318878	HMDB00121	C00504
Pantothenic acid	Metabolism of cofactors and vitamins_Pantothenate and CoA biosynthesis	[M+H]+	220.118	2.20117	0.0001554	0.0005	0.0378501	NA	NA
Pantothenic acid	Metabolism of cofactors and vitamins_Pantothenate and CoA biosynthesis	[M-H]-	218.103	3.51617	0.0001554	0.0007	0.0555864	HMDB00210	C00864
Uracil	Metabolism of cofactors and vitamins_Pantothenate and CoA biosynthesis	[M-H]-	111.02	4.16883	0.0001554	0.0007	8.33333	HMDB00300	C00106
Riboflavin	Metabolism of cofactors and vitamins_Riboflavin metabolism	[M+H]+	377.146	4.86633	0.0001554	0.0005	0.0923361	HMDB00244	C00255
4-Pyridoxic acid	Metabolism of cofactors and vitamins_Vitamine B6 metabolism	[M-H]-	182.046	1.76067	0.0001554	0.0007	0.0787402	HMDB00017	C00847
Pyroglutamic acid	Metabolism of other amino acids_D-Glutamine and D-glutamate metabolism	[M-H]-	128.035	4.85583	0.0001554	0.0007	0.158479	HMDB00267/HMDB00805	C01879/C02237
Pyroglutamic acid	Metabolism of other amino acids_D-Glutamine and D-glutamate metabolism	[M+H]+	130.05	0.995	0.0001554	0.0005	0.174825	HMDB00805/HMDB00267	C02237/C01879
Caffeic acid	Miscellaneous_Miscellaneous	[M-H]-	179.035	2.831	0.0001554	0.0007	0.13459	HMDB01964	C01481
Acetaminophen	Miscellaneous_Miscellaneous	[M-H]-	150.056	2.2375	0.0001554	0.0007	0.175131	HMDB01859	NA/NA
3-Hydroxy-3-methylglutaric acid	Miscellaneous_Miscellaneous	[M-H]-	163.061	1.2405	0.0001554	0.0005	0.231481	HMDB01890	C06809
Eugenol /Isoeugenol	Miscellaneous_Miscellaneous	[M-H]-	163.077	1.5665	0.0001554	0.0007	5.26316	HMDB05809/HMDB05802	C10453/C10469
7-methylguanine/1-methyl guanine	Nucleotide metabolism_Purine metabolism	[M-H]-	164.058	3.68017	0.0001554	0.0007	0.0671141	HMDB00897/HMDB03282	C04152
2'-O-Methylguanosine/2-Methylguanosine	Nucleotide metabolism_Purine metabolism	[M-H]-	296.1	3.579	0.0001554	0.0007	0.189753	HMDB05862/HMDB05862	NA/NA
7-Methylguanosine	Nucleotide metabolism_Purine metabolism	[M-H]-	297.109	1.43667	0.00699301	0.0121	0.378788	NA	C20674
Adenosine	Nucleotide metabolism_Purine metabolism	[M-H]-	266.09	3.04967	0.0001554	0.0007	6.66667	HMDB00050	C00212
Guanine	Nucleotide metabolism_Purine metabolism	[M-H]-	150.042	5.70967	0.0001554	0.0007	14.2857	HMDB00132	C00242
Guanosine	Nucleotide metabolism_Purine metabolism	[M-H]-	282.084	6.22633	0.0001554	0.0007	14.2857	HMDB00133	C00387
Guanosine	Nucleotide metabolism_Purine metabolism	[M+H]+	284.099	1.07017	0.0001554	0.0005	33.3333	HMDB00133	C00387
Hypoxanthine	Nucleotide metabolism_Purine metabolism	[M-H]-	135.031	4.56767	0.0001554	0.0007	33.3333	HMDB00157	C00262
Inosine	Nucleotide metabolism_Purine metabolism	[M+H]+	269.088	1.1055	0.0001554	0.0005	50	HMDB03950	NA
Inosine	Nucleotide metabolism_Purine metabolism	[M-H]-	267.073	5.3645	0.000859897	0.0028	50	HMDB00195	C00294
Thymine	Nucleotide metabolism_Pyrimidine metabolism	[M-H]-	125.036	1.82883	0.0018648	0.0053	0.147929	HMDB00262	C00178
beta-Pseudouridine	Nucleotide metabolism_Pyrimidine metabolism	[M+H]+	243.062	6.05583	0.0029526	0.0078	0.226244	HMDB00767	C02067
Uridine	Nucleotide metabolism_Pyrimidine metabolism	[M-H]-	243.062	4.17417	0.0003108	0.0012	7.69231	HMDB00296	C00299
2-Oxovaleric acid	Organic Acids and Derivatives_Keto-Acids and Derivatives	[M-H]-	115.04	2.09967	0.0001554	0.0007	0.0659196	HMDB01865/HMDB00310	C06255/
Cyclohexanone		[M-H]-	97.0658	2.33117	0.000621601	0.0021	0.0762195	HMDB03315	C00414
mono-Methyl adipate		[M-H]-	159.066	2.32983	0.000621601	0.0021	0.096432	HMDB59722	NA
Monomethyl glutaric acid		[M-H]-	145.051	2.90467	0.000621601	0.0021	0.0986193	HMDB00858	NA
Indomethacin		[M+H]+	358.085	9.5015	0.0001554	0.0005	0.107181	HMDB00244	C00255
trans-3-Hydroxycinnamic acid		[M+H]+	163.04	5.72083	0.0001554	0.0007	0.205339	HMDB01713	C12621

## Sheet: Table S3
Table S3. Coefficient of variation across repeatability experiment for samples under trypsination and under direct solvent extraction (n= 4 samples)
Metabolite	Detected ion	m/z	rt (min)	Average CV Tryp	Average CV Solvent
Alanine	[M-H]-	88.0404	7.26183	0.124219	0.0904768
Lactic acid	[M-H]-	89.0243	4.212	0.0883652	0.116362
Cyclohexanone	[M-H]-	97.0658	2.33117	0.148973	0.285492
Uracil	[M-H]-	111.02	4.16883	0.225351	0.179689
Uracil	[M+H]+	113.035	0.8805	0.130469	0.0874347
Proline	[M-H]-	114.056	6.28233	0.145419	0.124514
2-Oxovaleric acid	[M-H]-	115.04	2.09967	0.177431	0.112149
N-Acetylglycine	[M-H]-	116.035	5.4265	0.168451	0.0847483
Indole	[M-H]-	116.051	2.38167	0.210121	0.0944997
Valine	[M-H]-	116.072	5.31517	0.14009	0.113091
Succinic acid	[M-H]-	117.019	8.45083	0.0631142	0.145781
3-Hydroxy 3-methylbutyric acid /2-Hydroxy 3-methylbutyric acid /3-Hydroxypentanoic acid	[M-H]-	117.056	2.53317	0.0478941	0.171698
Threonine/Homoserine	[M-H]-	118.051	7.073	0.0818296	0.0973363
Betaine	[M+H]+	118.086	0.7345	0.118507	0.0991518
Thymine	[M-H]-	125.036	1.82883	0.181137	0.257422
Pyroglutamic acid	[M-H]-	128.035	4.85583	0.175803	0.0898056
Citraconic acid/Itaconic acid/Mesaconic acid	[M-H]-	129.019	8.41917	0.25558	0.212577
Mesaconic acid/Itaconic acid/Citraconic acid	[M-H]-	129.019	9.75467	0.0538456	0.143187
3-Methyl-2-oxovaleric acid/4-Methyl-2-oxovaleric acid	[M-H]-	129.056	1.78867	0.169942	0.130269
Pyroglutamic acid	[M+H]+	130.05	0.995	0.128303	0.0627301
4-hydroxy-proline/3-Hydroxy-proline	[M-H]-	130.051	8.21067	0.12123	0.166888
Isoleucine/Leucine	[M-H]-	130.087	3.799	0.156019	0.182572
Mesaconic acid/Citraconic acid	[M+H]+	131.034	0.930833	0.0856126	0.117764
2-hydroxycaproic acid	[M-H]-	131.071	2.03833	0.116295	0.100081
Ornithine	[M-H]-	131.083	9.01517	0.258266	0.250196
Leucine/Isoleucine	[M+H]+	132.102	1.0715	0.138556	0.130872
Threonic acid	[M-H]-	135.03	7.05383	0.127574	0.113108
Hypoxanthine	[M-H]-	135.031	4.56767	0.117147	0.352335
4-Imidazoleacrylic acid/5-Aminopyridine-3-carboxylic acid	[M-H]-	137.036	5.2505	0.367346	0.395635
Hypoxanthine	[M+H]+	137.046	0.901833	0.0936452	0.233988
α-Ketoglutaric acid	[M-H]-	145.014	8.56333	0.110367	0.187114
Monomethyl glutaric acid	[M-H]-	145.051	2.90467	0.177061	0.270639
Glutamine	[M-H]-	145.062	7.50217	0.216817	0.0552206
Lysine	[M-H]-	145.098	9.38317	0.14404	0.105286
Spermidine	[M+H]+	146.165	0.572	0.24493	0.125092
a-Hydroxyglutaric acid	[M-H]-	147.03	8.43933	0.156005	0.198319
Lysine	[M+H]+	147.113	0.603667	0.190758	0.0632767
Methionine	[M-H]-	148.044	4.08983	0.146408	0.106741
Tartaric acid	[M-H]-	149.009	9.247	0.102217	0.184766
Xylulose/Ribose	[M-H]-	149.047	4.08833	0.0744361	0.308475
Guanine	[M-H]-	150.042	5.70967	0.0796637	0.375512
Acetaminophen	[M-H]-	150.056	2.2375	0.337438	0.228355
Methionine	[M+H]+	150.059	0.896667	0.166752	0.100751
Xanthine	[M-H]-	151.026	6.34083	0.206181	0.209034
Adonitol/Arabitol	[M-H]-	151.061	6.36517	0.110952	0.142327
Guanine	[M+H]+	152.057	0.892667	0.118616	0.302461
3-Hydroxyanthranilic acid	[M+H]+	154.05	2.448	0.0955776	0.142009
Histidine	[M-H]-	154.062	7.271	0.155539	0.0792908
Histidine	[M+H]+	156.077	0.6125	0.252638	0.0384659
N-acetyl-Valine/N-acetyl-norvaline/N-Isovaleroylglycine	[M-H]-	158.082	2.32083	0.172336	0.304052
mono-Methyl adipate	[M-H]-	159.066	2.32983	0.166872	0.289785
Amylose	[M-H]-	161.046	7.92267	0.0978339	0.216109
Alpha-Aminoadipic acid	[M+H]+	162.076	0.799667	0.389061	0.435135
trans-3-Hydroxycinnamic acid	[M-H]-	163.04	5.72083	0.169664	0.0853684
Phenylpyruvic acid	[M-H]-	163.04	1.73983	0.110583	0.131378
3-Hydroxy-3-methylglutaric acid	[M+H]+	163.061	1.2405	0.142711	0.144473
Eugenol /Isoeugenol	[M-H]-	163.077	1.5665	0.170847	0.145184
N-Acetyl-Cystein	[M+H]+	164.038	1.495	0.151327	0.116472
7-methylguanine/1-methyl guanine	[M-H]-	164.058	3.68017	0.102743	0.141478
Phenylalanine	[M-H]-	164.072	3.075	0.141233	0.126346
Phenylpyruvic acid/trans-3-Hydroxycinnamic acid	[M+H]+	165.055	0.988167	0.141098	0.0826098
1,5-Anhydro-sorbitol	[M+H]+	165.076	1.31833	0.146146	0.190898
7-methylguanine/1-methyl guanine	[M+H]+	166.073	0.7955	0.259656	0.111378
Phenylalanine	[M+H]+	166.087	1.696	0.130623	0.128319
Pyridoxal	[M+H]+	168.066	0.763667	0.0372766	0.0772807
Quinaldic acid	[M-H]-	172.041	2.30367	0.12352	0.130213
Aconitic acid	[M-H]-	173.009	9.754	0.071851	0.219369
Arginine	[M-H]-	173.104	9.81633	0.143419	0.0905361
N-Acetyl-aspartic acid	[M-H]-	174.041	8.21533	0.116953	0.175089
N-Acetyl-ornithine	[M+H]+	175.108	0.993	0.115118	0.0282672
Indoxyl acetate	[M+H]+	176.069	5.8635	0.2233	0.108688
Caffeic acid	[M-H]-	179.035	2.831	0.151142	0.112048
Glucose/Galactose/Allose/Sorbose/Mannose/Fructose	[M-H]-	179.056	7.56817	0.32377	0.107691
Myo-inositol	[M-H]-	179.056	9.1245	0.155797	0.200483
Tyrosine	[M-H]-	180.067	5.71233	0.173609	0.115799
Hydroxyphenyllactic acid	[M-H]-	181.051	3.55333	0.0963004	0.179916
4-Pyridoxic acid	[M-H]-	182.046	1.76067	0.183612	0.136106
Phosphocholine	[M-H]-	182.059	8.36983	0.135989	0.201629
3-Amino-3-(4-hydroxyphenyl)propanoic/Threo-3-Phenylserine	[M+H]+	182.082	0.988167	0.141098	0.0826098
Mannitol/Dulcitol	[M+H]+	183.085	0.987833	0.138752	0.0839863
10-hydroxydecanoic acid/3-hydroxydecanoic acid	[M-H]-	187.134	1.58283	0.171139	0.0906057
N acetyl glutamic acid/N-Acetyl-glutamic acid	[M-H]-	188.056	7.98417	0.136065	0.193834
N-Acetyl-methionine	[M-H]-	190.054	2.36733	0.0811388	0.165885
Citric acid/Isocitric acid	[M-H]-	191.02	9.73617	0.0770885	0.18164
Isocitric acid/Citric acid	[M+H]+	193.035	0.954333	0.119362	0.121014
Caffeine	[M-H]-	193.074	1.372	0.203016	0.182931
Galactonic acid	[M-H]-	195.051	7.518	0.11576	0.0962105
N-Acetyl-phenylalanine	[M-H]-	206.082	1.80883	0.156655	0.12119
Kynurenine	[M-H]-	207.078	3.4375	0.243781	0.160348
N-Acetyl-phenylalanine	[M+H]+	208.097	6.64583	0.244988	0.172695
Pantothenic acid	[M-H]-	218.103	3.51617	0.176728	0.196816
Propionylcarnitine	[M+H]+	218.139	1.12083	0.128257	0.179315
N-Acetyl-5-hydroxytryptamine	[M+H]+	219.113	4.85483	0.285401	0.306101
Pantothenic acid	[M+H]+	220.118	2.20117	0.119725	0.115923
5-hydroxy-tryptophan	[M+H]+	221.092	1.30133	0.278017	0.222187
N-Acetylgalactosamine/N-Acetylmannosamine/N-Acetyl-glucosamine	[M+H]+	222.096	1.30267	0.239908	0.221885
Uridine	[M-H]-	243.062	4.17417	0.233043	0.185721
beta-Pseudouridine	[M-H]-	243.062	6.05583	0.0670071	0.105023
Uridine	[M+H]+	245.077	0.952167	0.255748	0.246219
N-acetyl-tryptophan	[M+H]+	247.108	5.86617	0.161859	0.0472237
γ-Glutamylcysteine	[M+H]+	251.07	0.903833	0.146395	0.183361
Glucose 1-phosphate/Fructose 1-phosphate/Galactose 1-phosphate/Fructose 6-phosphate/Mannose 6-phosphate/α-Mannose 1-phosphate/Glucose-6-PO4	[M-H]-	259.022	9.17933	0.0913906	0.120817
Adenosine	[M-H]-	266.09	3.04967	0.211337	0.172851
Inosine	[M-H]-	267.073	5.3645	0.307463	0
Adenosine	[M+H]+	268.104	0.932833	0.104839	0.195706
Inosine	[M+H]+	269.088	1.1055	0.239351	0.301033
2-Hydroxyhexadecanoic acid	[M-H]-	271.228	1.37167	0.214061	0.124584
Elaidic acid	[M-H]-	281.249	1.34817	0.238396	0.0721909
Guanosine	[M-H]-	282.084	6.22633	0.292093	0.573557
Guanosine	[M+H]+	284.099	1.07017	0.287193	0.247536
Hexadecanedioic acid	[M-H]-	285.207	1.42633	0.16059	0.150053
Argininosuccinic acid	[M-H]-	289.115	9.026	0.0915658	0.156334
13-Hydroxyoctadeca-9Z,11E-dienoic acid	[M-H]-	295.228	1.38233	0.157677	0.0881784
5'-Deoxy-5'-(methylthio)adenosine	[M-H]-	296.082	2.15767	0.169517	0.22867
2'-O-Methylguanosine/2-Methylguanosine	[M-H]-	296.1	3.579	0.217085	0.142821
7-Methylguanosine	[M+H]+	297.109	1.43667	0.3442	0.118257
alpha-Hydroxystearic acid	[M-H]-	299.259	1.367	0.152437	0.172722
N-Acetylneuraminic acid	[M-H]-	308.099	7.56333	0.162411	0.118115
N-Acetylneuraminic acid	[M-H]-	308.099	8.9655	0.520427	0.229174
UMP	[M+H]+	325.043	0.813333	0.192346	0.329996
Sucrose/Trehalose/Melibiose	[M-H]-	341.109	8.05417	0.139484	0.113652
5'-AMP/3'-AMP	[M-H]-	346.056	8.41433	0.155182	0.183219
3'-AMP/5'-AMP	[M-H]-	346.056	7.78633	0.0723883	0.328045
Inosine 5'-monophosphate	[M-H]-	347.04	9.1045	0.14055	0.524579
Inosine 5'-monophosphate	[M+H]+	349.055	0.907	0.14966	0.398493
Indomethacin	[M+H]+	358.085	9.5015	0.0902587	0.341088
GMP	[M-H]-	362.051	9.35933	0.112762	0.453778
GMP	[M+H]+	364.065	0.836167	0.189776	0.182733
Riboflavin	[M+H]+	377.146	4.86633	0.190748	0.12576
Lactoylglutathione	[M+H]+	380.113	1.13217	0.319235	0.26277
adenosylmethionine	[M-H]-	397.13	8.10133	0.133517	0.288904
ADP	[M-H]-	426.022	8.37633	0.214827	0.183622
ADP	[M-H]-	426.022	8.846	0.24539	0.193596
Folic acid	[M-H]-	440.132	9.457	0.181522	0.0730167
GDP	[M-H]-	442.017	9.84883	0.128996	0.199314
Folic acid	[M+H]+	442.148	4.35767	0.125347	0.0766045
Riboflavin 5'-monophosphate	[M-H]-	455.095	8.21183	0.874498	0.165692
Cytidine 5'-diphosphocholine	[M-H]-	487.1	8.602	0.0878382	0.101758
D-Raffinose/Maltotriose	[M-H]-	503.162	9.2265	0.234033	0.0515308
GTP	[M-H]-	521.983	10.335	0.175018	0.264603
Cyclic ADP-ribose	[M-H]-	540.053	7.99217	0.135611	0.230564
Uridine 5'-diphosphogalactose	[M-H]-	565.048	9.41483	0.093	0.207115
Uridine 5'-diphosphoglucuronic acid	[M-H]-	579.027	10.642	0.215929	0.223742
Guanosine 5'-diphosphoglucose/Guanosine 5'-diphospho-mannose	[M-H]-	604.07	10.0832	0.0661815	0.232523
Uridine 5′-diphospho-N-acetylglucosamine	[M-H]-	606.074	8.92633	0.0970343	0.233644
Glutathione oxidized	[M-H]-	611.144	9.58	0.107389	0.232535
Glutathione oxidized	[M+H]+	613.16	0.906	0.0994282	0.184567
ß-Nicotinamide adenine dinucleotide	[M-H]-	662.102	7.9855	0.279375	0.229234
NADH	[M-H]-	664.117	7.598	0.558725	0.200632

## Sheet: Table S4
Table S4. List of external standards used for DCs analysis.
not detected
poor peak shape					RP-C18	ZICpHILIC
Compound	Elemental formula	Accurate Mass	ESI+	ESI-	Retention time	Retention time
					Rt (min)	Rt (min)
Alanine 13C	13C1 12C2 H7 N O2	90.051	91.0583		1.03
Metformin	C4 H11 N5	129.101	130.109		0.76
Ethylmalonic acid	C5 H8 O4	132.042		131.035		7.95
Aspartate 15N	C4 H7 15N1 O4	134.035	135.042	133.027	0.77	8.36
Glucose 13C	13C1 12C5 H12 O6	181.067	204.05596 (+Na)	216.03614 (+HCl)	0.76	7.53
2-Aminoanthracene	C14 H11 N	193.089	194.096		8.05
Amiloride	C6 H8 Cl N7 O	229.048	230.055	228.04061 and 264.01729 (+HCl)	2.19	6.95 - 7.40
Imipramine	C19 H24 N2	280.194	281.201		7.21
Atropine	C17 H23 N O3	289.168	290.175		5.11
Prednisone	C21 H26 O5	358.178	359.185	403.17482 (+HCOOH) and 393.14742 (+HCl)	7.2	1.7
Colchicine	C22 H25 N O6	399.168	400.175		6.91
Dihydrostreptomycin	C21 H41 N7 O12	583.281	584.2886 et 292.64794	618.25072 (+HCl)	0.57
Roxithromycin (fragment)	C29 H54 O10 N2	590.378	591.385	625.34725 (+HCl)	6.77

## Sheet: Table S5
Table S5. List of metabolites significantly altered during LPS activation (Significant changes over the time). Observation of the evolution over time (comparison Tx+1/Tx)
				Wilcoxon analysis
				T2/T0			T6/T2			T16/T6			T24/T16			ID
Metabolite	Detected ion	m/z	rt (min)	pvalue	pvalue_BH	Ratio	pvalue	pvalue_BH	Ratio	pvalue	pvalue_BH	Ratio	pvalue	pvalue_BH	Ratio	HMDB_id	kegg_id
13-Hydroxyoctadeca-9Z,11E-dienoic acid	[M-H]-	295.227	1.42833	0.0268002	0.0629	1.5625	0.197808	0.2984	0.714286	0.842836	0.968	1.26582	0.629726	1	1.04167	NA	NA
1-methyl guanine/7-methylguanine	[M+H]+	166.072	0.868667	4.43761e-05	0.0007	0.278552	0.513723	0.6987	1.47059	0.798745	0.9951	1.06383	0.629726	1	0.877193	HMDB03282/HMDB00897	C02242
2,2'-Thiodiacetic acid	[M-H]-	148.991	8.90817	0.379339	0.5295	0.869565	0.377685	0.4785	0.735294	0.0100445	0.3106	1.85185	0.347358	1	1.28205	HMDB42032	C14872
2'-O-Methylguanosine/2-Methylguanosine	[M-H]-	296.1	3.6175	0.0187948	0.0477	0.694444	0.442833	0.5352	0.826446	0.291343	0.7262	1.42857	0.629726	1	1.02041	HMDB05862/HMDB05862	NA/NA
2'-O-Methylguanosine/2-Methylguanosine/7-Methylguanosine	[M+H]+	298.115	1.547	0.0438791	0.1077	0.512821	0.513723	0.6987	1.26582	0.442833	0.9951	1.20482	0.442833	1	0.877193	HMDB05862/HMDB05862/HMDB01107	NA/NA/NA
2-O-Methylinosine	[M+H]+	283.103	1.62433	0.0438791	0.1077	0.561798	0.932301	0.9631	0.990099	0.0596571	0.9286	1.5873	0.0887338	0.8702	0.70922	HMDB03950	NA
3,4-Dihydroxy-phenylalanine	[M+H]+	198.076	1.41317	0.0266782	0.0725	0.191571	0.218921	0.4357	3.57143	0.26567	0.9527	0.404858	0.551167	1	1.66667	HMDB00181	C00355
4-Guanidinobutyric acid	[M+H]+	146.092	0.792833	0.0069848	0.0269	1.75439	0.629726	0.7773	0.943396	0.644023	0.9951	1.11111	0.0261968	0.8525	0.735294	HMDB03464	C01035
5'-AMP/3'-AMP/dGMP	[M-H]-	346.055	8.08983	0.00562246	0.0191	3.125	0.67066	0.7366	1.69492	0.0241843	0.4412	1.78571	0.0284207	1	0.286533	HMDB00045/HMDB03540/HMDB01044	C00020
5-Methoxyindoleacetate/Indolelactic acid/Cinnamoylglycine	[M-H]-	204.066	2.853	0.133549	0.231	0.662252	0.712535	0.7714	0.925926	0.0204892	0.429	2.08333	0.755285	1	1.21951	HMDB04095/HMDB00671/HMDB11621	C02043
6-Hydroxypyridine-2-carboxylic acid	[M-H]-	138.02	1.944	0.00448939	0.0164	2.12766	0.26567	0.3685	0.746269	0.377685	0.7638	0.917431	0.551167	1	1.38889	NA	NA
7-methylguanine/1-methyl guanine	[M-H]-	164.058	3.7245	0.00356045	0.0138	0.555556	0.347358	0.4514	0.840336	0.589876	0.894	1.2987	0.798745	1	1.20482	HMDB00897/HMDB03282	C04152
Aconitic acid	[M-H]-	173.009	9.923	0.0225002	0.0547	1.28205	0.0204892	0.0574	0.8	0.218921	0.6803	1.08696	0.932301	1	1	HMDB00958/HMDB00072	C00417
Adenine	[M-H]-	134.047	3.48183	0.00448939	0.0164	1.69492	0.0241843	0.0647	1.47059	0.442833	0.7889	1.38889	0.551167	1	0.515464	HMDB00034	C00147
Adenosine	[M+H]+	268.104	0.946333	0.00448939	0.0204	4.34783	0.347358	0.5683	0.645161	0.40951	0.9951	1.17647	0.143168	0.9249	0.393701	HMDB00050	C00212
Adenosine 5'-phosphosulfate	[M-H]-	428.026	8.669	1.77505e-05	0.0004	2.5	0.044902	0.104	0.775194	0.0172712	0.3984	1.28205	0.0518646	1	0.819672	HMDB01003	C00224
ADP	[M-H]-	426.022	8.6665	4.43761e-05	0.0006	2.63158	0.0596571	0.1276	0.78125	0.0350494	0.5021	1.28205	0.0566392	1	0.8	HMDB01341	C00008
Alpha-Aminoadipic acid	[M+H]+	162.076	0.820167	0.0187948	0.0559	1.6129	0.551167	0.723	0.925926	0.0432626	0.9286	1.31579	0.0204892	0.8525	0.735294	HMDB00510	C00956
alpha-Hydroxystearic acid	[M-H]-	299.259	1.43383	0.00448939	0.0164	2.63158	0.00451305	0.0205	0.632911	0.0518646	0.5882	1.85185	0.977402	1	1.11111	NA	NA
Aminoisobutyric acid	[M-H]-	102.056	8.738	0.0012943	0.0066	1.85185	0.318585	0.425	0.819672	0.513723	0.8363	0.917431	0.442833	1	0.854701	HMDB00112	C05145
Amylose	[M-H]-	161.045	9.378	0.000400864	0.0032	3.22581	0.0683614	0.1404	0.617284	0.932301	0.9859	1.17647	0.551167	1	0.840336	HMDB03403	C03761
Arabitol/Adonitol	[M-H]-	151.061	6.544	0.0128868	0.0359	0.534759	0.40951	0.5066	0.833333	0.477575	0.8145	1.53846	0.551167	1	0.934579	HMDB00568/HMDB01851	C00474
Arginine	[M-H]-	173.104	10.1027	1	1	0.847458	0.00037128	0.0079	0.70922	0.798745	0.968	1.07527	0.977402	1	1.08696	HMDB00517	C00062
Argininosuccinic acid	[M-H]-	289.116	9.271	0.0268002	0.0629	1.6129	0.40951	0.5066	0.877193	0.340674	0.7457	0.757576	0.12594	1	0.662252	HMDB00052	C03406
Aspartic acid	[M-H]-	132.03	8.74067	0.000736644	0.0048	2.38095	0.0734258	0.1504	0.714286	0.105893	0.6658	0.826446	0.442833	1	1	HMDB00191	C00049
ATP	[M-H]-	505.988	9.12833	0.000545826	0.0039	2.63158	0.0241843	0.0647	0.588235	0.932301	0.9859	1	0.842836	1	0.917431	HMDB00538	C00002
Benzoic acid	[M-H]-	121.03	2.35767	0.0225002	0.0547	2	0.0887338	0.1695	0.649351	0.442833	0.7889	1.14943	0.755285	1	1.49254	HMDB01870	C00180
Caproic acid	[M-H]-	115.076	1.77683	0.316386	0.4635	0.833333	0.0241843	0.0647	0.649351	0.0332414	0.4918	0.833333	0.26567	1	1.23457	HMDB00535	C01585
Carnitine	[M+H]+	162.112	0.754667	0.0225002	0.0636	1.5873	0.629726	0.7773	0.925926	0.0432626	0.9286	1.31579	0.0204892	0.8525	0.735294	HMDB00062	C15025
Citraconic acid/Itaconic acid	[M-H]-	129.02	8.6815	0.0105734	0.0318	1.63934	0.127688	0.2166	0.806452	0.67066	0.9314	0.952381	0.887386	1	0.934579	HMDB00634/HMDB02092	C00490
Citric acid/Isocitric acid	[M-H]-	191.019	9.87533	0.0128868	0.0359	1.28205	0.000495534	0.0081	0.729927	0.26567	0.698	1.05263	0.525283	1	0.961538	HMDB00094/HMDB00193	C00311
Cystine	[M-H]-	239.017	8.78267	0.0128868	0.0359	0.236967	0.887386	0.9108	0.990099	0.842836	0.968	0.970874	0.0780243	1	1.75439	HMDB00192	C00491
Cytosine	[M-H]-	110.036	3.60733	0.189587	0.3072	0.877193	0.887386	0.9108	0.78125	7.39602e-07	0.001	50	0.887386	1	1.5625	HMDB00630	C00380
Diglycolic acid/Malic acid	[M-H]-	133.014	9.0375	2.81049e-05	0.0005	2.63158	0.113502	0.2	0.724638	0.442833	0.7889	1	0.291343	1	0.8	NA/HMDB00744	C00711
Dihydrothymine	[M-H]-	127.052	2.1925	0.000504805	0.0039	0.282486	0.794969	0.8427	0.970874	0.159973	0.6714	1.51515	0.318585	1	0.877193	HMDB00079	C00906
Dimethyl suberate/Diethyladipate	[M-H]-	201.113	1.61267	0.000980713	0.0055	2.22222	0.0241843	0.0647	0.621118	0.887386	0.9803	0.980392	0.477575	1	0.884956	NA/NA	NA/NA
Folic acid	[M-H]-	440.132	9.59433	0.65055	0.7753	0.847458	0.00037128	0.0079	0.540541	0.67066	0.9314	1.19048	0.932301	1	1.13636	HMDB00121	C00504
Galactose/Glucose/Allose/Mannose/Sorbose/Fructose	[M-H]-	179.056	7.857	0.525399	0.6746	0.729927	0.40951	0.5066	0.892857	0.0204892	0.429	0.671141	0.26567	1	1.33333	HMDB00143/HMDB00122/HMDB01151/HMDB00169/HMDB01266/HMDB00660	C00031
Glutamic acid/N-Methyl-aspartic acid	[M-H]-	146.046	8.7385	0.0012943	0.0066	1.88679	0.241524	0.3448	0.787402	0.513723	0.8363	0.934579	0.551167	1	0.854701	HMDB00148/HMDB02393	C00025/C12269
Glutamine	[M-H]-	145.062	7.87217	0.150667	0.2557	1.1236	0.00363662	0.0177	0.649351	0.347358	0.7457	0.869565	0.347358	1	1.21951	HMDB00641	C00064
Glutathione oxidized	[M-H]-	611.145	9.71433	0.000143483	0.0015	3.0303	0.10053	0.1835	0.714286	0.347358	0.7457	0.840336	0.589876	1	0.78125	HMDB03337	C00127
Glycerophosphorylcholine	[M-H]-	256.096	8.11317	0.65055	0.7753	1.05263	0.000495534	0.0081	1.88679	0.197808	0.6714	1.21951	0.113502	1	0.729927	HMDB00086	C00670
Glycyl-leucine	[M+H]+	189.123	2.014	0.0438791	0.1077	3.22581	0.40951	0.6139	0.763359	0.442833	0.9951	0.884956	0.712535	1	0.862069	HMDB00759	C02155
GMP	[M-H]-	362.051	9.593	1.77505e-05	0.0004	2.43902	0.318585	0.425	1.28205	0.0518646	0.5882	2.85714	0.00829316	1	0.242131	HMDB01397	C00144
Guanosine 5'-diphosphoglucose/Guanosine 5'-diphospho-mannose	[M-H]-	604.069	10.2723	0.00562246	0.0191	1.75439	0.10053	0.1835	0.757576	0.143168	0.6714	1.6129	0.40951	1	0.869565	NA/HMDB01163	C00096
Guanosine 5'-diphospho-ß-fucose/Adenosine-5'-diphosphoglucose	[M-H]-	588.074	10.0342	1.4792e-06	0.0001	2.22222	0.000495534	0.0081	0.666667	0.157123	0.6714	1.16279	0.260133	1	0.892857	HMDB01095/HMDB06557	C00325/NA
Homoserine/Threonine	[M-H]-	118.051	7.61133	2.95841e-06	0.0001	0.555556	0.629726	0.7019	1.04167	0.165765	0.6714	0.900901	0.842836	1	1.0989	HMDB00719/HMDB00167	C00188
Hydrocinnamic acid	[M-H]-	149.061	1.74783	0.486503	0.6385	0.862069	0.00182978	0.013	0.689655	0.589876	0.894	1.03093	0.105893	1	2.5	HMDB00764	C05629
Hydroxyphenyllactic acid	[M-H]-	181.051	3.5705	0.413411	0.5672	0.757576	0.513723	0.599	0.917431	0.00829316	0.2907	2.04082	0.932301	1	1.16279	HMDB00755	C03672
Hypoxanthine	[M-H]-	135.031	5.4085	0.00727736	0.0235	1.5625	0.755285	0.8056	0.436681	0.10053	0.6658	3.7037	0.67066	1	1.16279	HMDB00157	C00262
Indoleacetic acid	[M-H]-	174.056	3.34717	0.346999	0.4961	0.724638	0.0100445	0.0345	0.704225	0.442833	0.7889	1.36986	0.67066	1	1.03093	HMDB00197	C00954
Inosine 5'-monophosphate	[M-H]-	347.039	9.33483	0.0268002	0.0629	2.77778	0.347358	0.4514	0.826446	0.977402	0.9942	1.06383	0.377685	1	1.07527	HMDB00175	C00130
Isobutyric acid/Acetoin	[M-H]-	87.0453	2.76517	0.169317	0.2824	0.952381	0.0144925	0.0447	0.689655	0.842836	0.968	1.11111	0.887386	1	1.06383	HMDB01873/HMDB03243	C02632
Isoleucine/Leucine	[M-H]-	130.087	3.92233	0.486503	0.6385	0.877193	0.000274392	0.0078	0.518135	0.686041	0.9452	1.21951	0.977402	1	1.06383	HMDB00172/HMDB03640	C00123
Isovaleric acid/Ethylmethylacetic acid	[M-H]-	101.061	2.387	0.346999	0.4961	0.925926	0.0284207	0.0721	0.724638	0.67066	0.9314	1.13636	0.755285	1	1.11111	HMDB00718/HMDB02176	C18319
Itaconic acid/Citraconic acid	[M-H]-	129.02	9.922	0.0438791	0.0929	1.28205	0.0172712	0.0512	0.78125	0.159973	0.6714	1.0989	0.772782	1	0.970874	HMDB02092/HMDB00634	C00490
Kynurenic acid	[M-H]-	188.035	2.79317	0.785949	0.8782	0.892857	0.012094	0.0389	0.704225	0.291343	0.7262	1.75439	0.842836	1	0.980392	HMDB00715	C01717
Kynurenine	[M+H]+	209.092	1.69017	0.169317	0.3111	0.763359	0.477575	0.6657	1.26582	1.40524e-05	0.0114	50	0.67066	1	1.21951	HMDB00684	C00328
Lactoylglutathione	[M+H]+	380.112	1.12767	0.0105734	0.0364	5	0.887386	0.9375	1.33333	0.629726	0.9951	0.520833	0.887386	1	1.16279	HMDB01066	C03451
Lysine	[M-H]-	145.098	9.66583	0.565784	0.7091	0.909091	0.000495534	0.0081	0.591716	0.887386	0.9803	1.16279	0.977402	1	1.16279	HMDB00182	C00047
Malonic acid	[M-H]-	103.004	8.9915	5.91682e-06	0.0002	6.66667	0.0179014	0.0529	0.411523	0.318585	0.7374	1.31579	0.755285	1	1.11111	HMDB00691	C00383
Mannitol	[M-H]-	181.07	5.86183	0.525399	0.6746	0.833333	0.00681174	0.0267	0.819672	0.798745	0.968	0.961538	0.67066	1	1.06383	HMDB00765	C00392
Mevalonic acid	[M-H]-	147.066	2.77283	0.785949	0.8782	0.793651	0.00231643	0.0143	0.653595	0.842836	0.968	1.14943	0.977402	1	1.11111	HMDB00227	C00418
Myo-inositol	[M-H]-	179.056	9.37583	0.000545826	0.0039	3.125	0.0596571	0.1276	0.628931	0.977402	0.9942	1.14943	0.664937	1	0.869565	HMDB00211	C00137
N-Acetyl-a-glucosamine 1-phosphate	[M-H]-	300.049	8.68517	0.000400864	0.0032	1.88679	0.00829316	0.0305	0.854701	0.26567	0.698	1.0989	0.197808	1	1	HMDB01367	C04256
N-Acetyl-alanine	[M-H]-	130.051	3.68683	0.211497	0.3339	1.0989	0.000102805	0.0078	0.746269	0.0780243	0.6372	1.19048	0.10053	1	0.884956	HMDB00766	NA
N-Acetyl-Asp-Glu	[M-H]-	303.083	9.37683	0.000143483	0.0015	2.5641	0.0332414	0.081	0.625	0.712535	0.9452	1.05263	0.0887338	1	0.729927	NA	NA
N-Acetyl-glucosamine/N-Acetylmannosamine/N-Acetylgalactosamine	[M+H]+	222.095	1.30017	0.147685	0.2859	1.81818	0.326243	0.551	0.46729	0.00451305	0.5248	16.6667	0.47039	1	0.657895	HMDB00215/HMDB01129/HMDB00212	C00140
N-Acetylneuraminic acid	[M-H]-	308.098	7.8545	0.059498	0.1196	1.21951	0.012094	0.0389	0.689655	0.044902	0.5461	1.44928	0.755285	1	1.05263	HMDB00230	C19910
N-acetyl-Valine/N-acetyl-norvaline	[M+H]+	160.097	5.0055	0.260448	0.4257	1.20482	0.00291403	0.1312	0.552486	0.000144222	0.0391	2.17391	0.0518646	0.8525	0.684932	HMDB11757/NA	NA/NA
NADH	[M-H]-	664.116	7.871	5.91682e-06	0.0002	4.16667	0.977402	0.9832	1.03093	0.10053	0.6658	0.510204	0.442833	1	1.20482	HMDB01487	C00004
Nicotinamide	[M-H]-	121.041	2.39467	0.607524	0.7442	0.684932	0.0100445	0.0345	0.813008	0.10053	0.6658	1.38889	0.755285	1	1.11111	HMDB01406	C00153
Ornithine	[M-H]-	131.083	10.1028	0.927908	0.9611	0.8	0.000495534	0.0081	0.714286	0.728978	0.9632	1.08696	1	1	1.08696	HMDB00214	C00077
Oxalic acid	[M-H]-	88.9883	9.63883	5.91682e-06	0.0002	3.125	0.0204892	0.0574	0.632911	0.589876	0.894	1.21951	0.932301	1	1.0989	HMDB02329	C00209
Palmitic acid	[M-H]-	255.233	1.42433	0.0225002	0.0547	1.21951	0.326243	0.4348	1.07527	0.798745	0.968	1.03093	0.488328	1	1.02041	HMDB00220	C00249
Phenylalanine	[M-H]-	164.071	3.15983	0.65055	0.7753	0.877193	0.00143261	0.0116	0.662252	0.932301	0.9859	1.08696	0.887386	1	1.14943	HMDB00159	C00079
Phosphocholine	[M-H]-	182.059	8.62983	0.000980713	0.0055	2.22222	0.197808	0.2984	0.714286	0.442833	0.7889	0.806452	0.26567	1	0.793651	NA	NA
Phosphoenolpyruvic acid	[M-H]-	166.975	9.67633	1.4792e-06	0.0001	20	0.00291403	0.016	0.606061	0.842836	0.968	0.877193	0.0683614	1	1.14943	HMDB00263	C00074
Phosphoserine	[M-H]-	184.001	8.736	0.00218479	0.0096	1.96078	0.197808	0.2984	1.38889	0.044902	0.5461	0.632911	0.887386	1	0.990099	HMDB00272	C01005
Proline	[M-H]-	114.056	6.40183	0.316386	0.4635	0.952381	0.000274392	0.0078	0.636943	0.842836	0.968	1.07527	0.932301	1	1.04167	HMDB00162	C00148
Quinolinic acid	[M-H]-	166.014	8.64333	0.413411	0.5672	1.19048	0.908053	0.9306	1.06383	0.000144222	0.0245	50	0.127688	1	1.5873	HMDB00232	C03722
Saccharic acid	[M-H]-	209.03	9.58067	0.00356045	0.0138	1.49254	0.00451305	0.0205	0.729927	0.712535	0.9452	1.07527	0.95395	1	0.980392	HMDB00663	C00818
Sedoheptulose 7-phosphate	[M-H]-	289.033	9.2135	0.0268002	0.0629	0.434783	0.977402	0.9832	1.49254	0.477575	0.8145	2.04082	0.842836	1	1.0989	HMDB01068	C00281
Serine	[M-H]-	104.035	8.025	0.0128868	0.0359	1.44928	0.127688	0.2166	0.609756	0.241524	0.6906	0.813008	0.127688	1	1.40845	HMDB00187	C00065
S-ethyl-cysteine	[M-H]-	148.044	4.21583	0.0908424	0.1689	1.16279	0.0241843	0.0647	0.724638	0.127688	0.6714	0.847458	0.127688	1	1.21951	NA	NA
Spermidine	[M+H]+	146.165	0.590333	9.91067e-05	0.0013	2.63158	0.842836	0.9093	0.869565	0.755285	0.9951	1.0101	0.10053	0.8841	0.775194	HMDB01257	C00315
Spermine	[M+H]+	203.223	0.596167	4.43761e-05	0.0007	2.85714	0.0683614	0.2582	0.787402	0.127688	0.9286	1.0989	0.442833	1	0.917431	HMDB01256	C00750
Tartaric acid	[M-H]-	149.009	9.455	1.4792e-06	0.0001	14.2857	0.00231643	0.0143	0.581395	0.798745	0.968	1.13636	0.551167	1	1.08696	HMDB00956	C00898
Taurine	[M-H]-	124.007	7.8415	0.037418	0.0812	1.31579	0.0887338	0.1695	0.826446	0.47039	0.8145	1.13636	0.298487	1	0.840336	HMDB00251	C00245
Thiamine	[M+H]+	265.111	0.736	0.0225002	0.0636	0.537634	0.629726	0.7773	0.952381	0.977402	0.9951	1.02041	0.908053	1	1.02041	HMDB00235	C00378
Thymine	[M-H]-	125.036	2.51883	2.81049e-05	0.0005	4.16667	0.0596571	0.1276	0.662252	0.318585	0.7374	0.854701	0.178182	1	1.5873	HMDB00262	C00178
trans-3-Hydroxycinnamic acid	[M-H]-	163.04	5.86367	0.00862524	0.027	0.763359	0.887386	0.9108	1	0.0100445	0.3106	0.806452	0.798745	1	1.03093	HMDB01713	C12621
Tryptophan	[M-H]-	203.082	4.3185	0.0908424	0.1689	1.19048	0.0518646	0.1166	0.735294	0.0332414	0.4918	0.763359	0.842836	1	1.05263	HMDB00929	C00078
Tyrosine	[M-H]-	180.067	5.85017	0.880112	0.9336	0.917431	0.000857939	0.01	0.735294	0.798745	0.968	1.02041	0.885209	1	1.06383	HMDB00158	C00082
UDP	[M-H]-	402.995	9.59167	0.000288445	0.0027	3.0303	0.629726	0.7019	0.892857	0.712535	0.9452	0.970874	0.0887338	1	0.724638	HMDB00295	C00015
Uridine 5′-diphospho-N-acetylglucosamine	[M-H]-	606.073	9.20183	1.03544e-05	0.0003	3.22581	0.000201172	0.0078	0.446429	0.044902	0.5461	1.38889	0.40951	1	0.892857	HMDB00290	C00043
Uridine 5'-diphosphogalactose	[M-H]-	565.048	9.644	1.77505e-05	0.0004	1.92308	0.513723	0.599	0.952381	0.291343	0.7262	1.16279	0.291343	1	0.854701	HMDB00302	C00052
Valine	[M-H]-	116.072	5.468	0.486503	0.6385	1.03093	0.00122127	0.0115	0.653595	0.977402	0.9942	1.08696	0.842836	1	1.06383	HMDB00883	C00719
Val-Pro	[M+H]+	215.139	1.11217	0.103709	0.219	0.724638	0.0284207	0.1986	1.36986	0.402402	0.9951	0.877193	0.664937	1	0.884956	NA	NA
